# Supplementary material for: Manganese transporter SLC30A10 and iron transporters SLC40A1 and SLC11A2 impact dietary manganese absorption
Source: PubMed Central journal article supplement — bioRxiv. 2024 Jul 20:2024.07.17.603814. Preprint. [Version 1] doi: 10.1101/2024.07.17.603814 (PMC11275741; doi:10.1101/2024.07.17.603814), 2024-07-20
Supplement: media-1.pdf [file media-1.pdf]

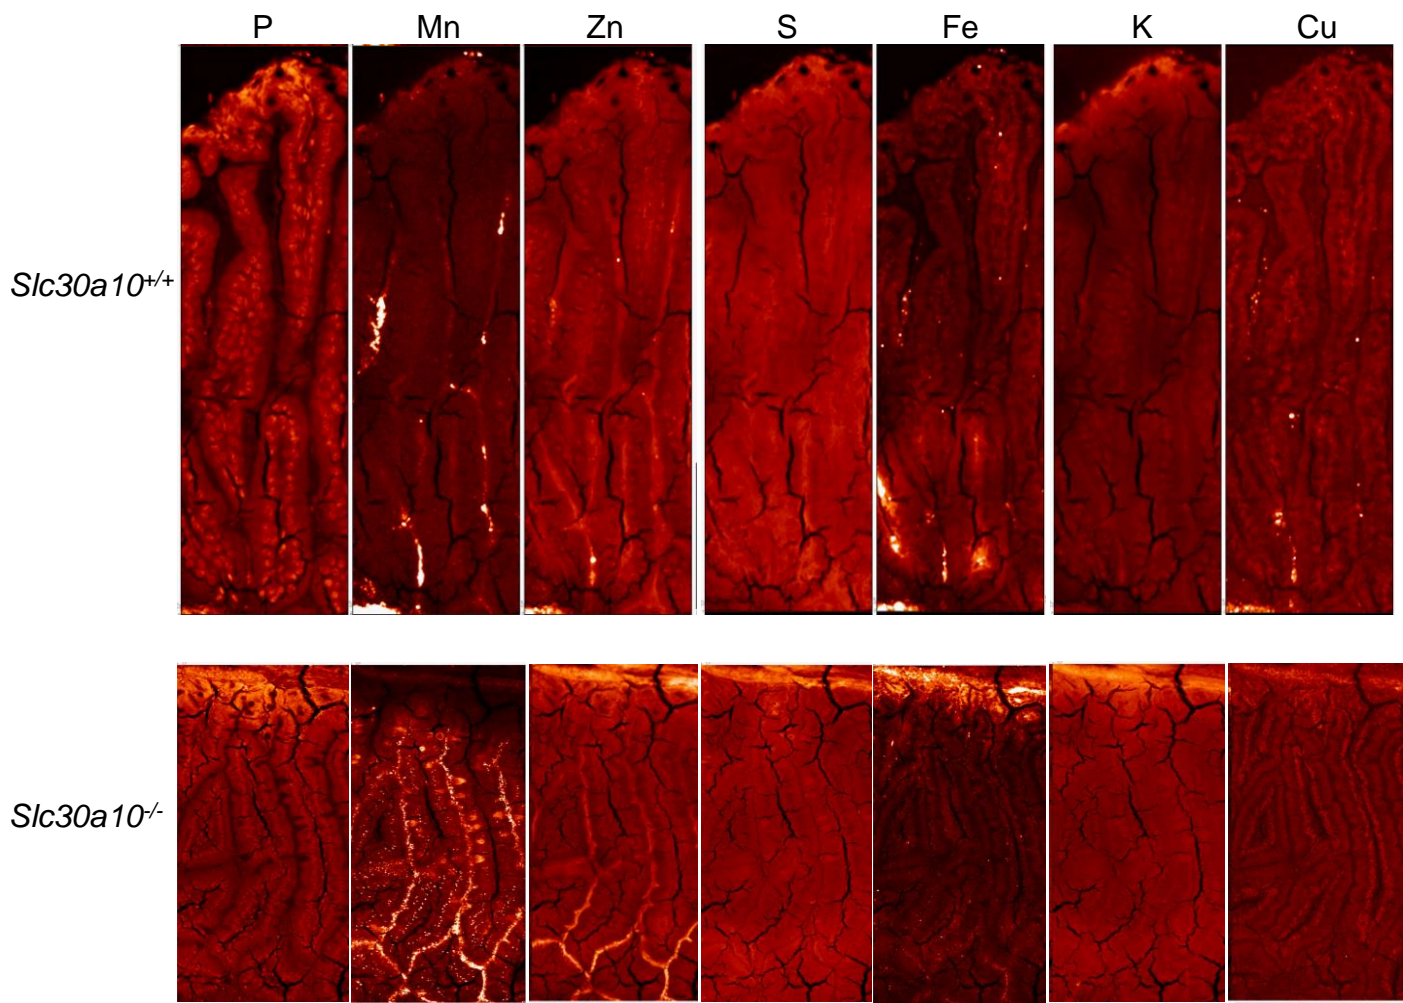

Figure S1

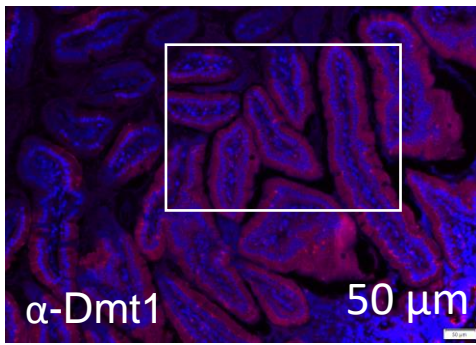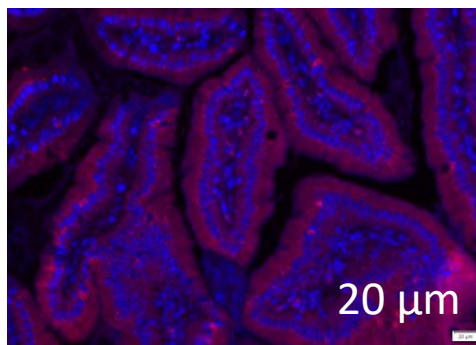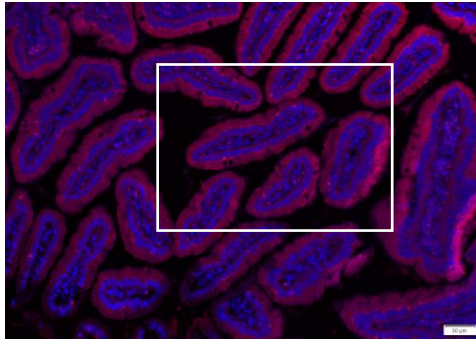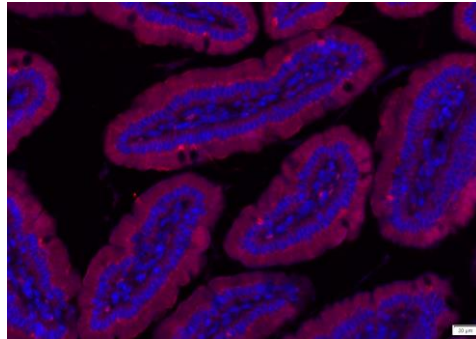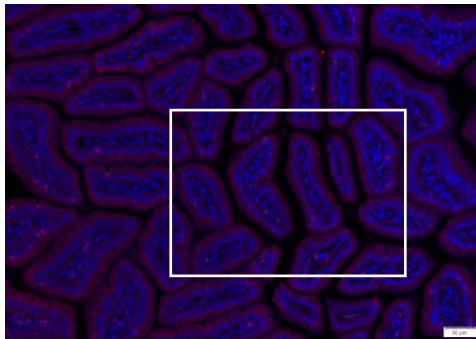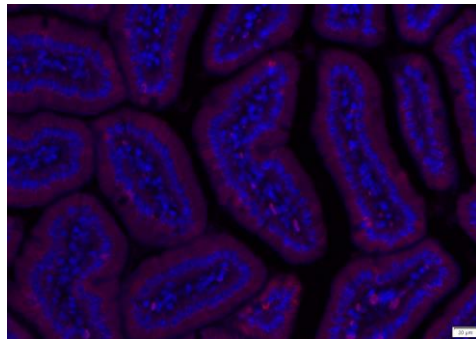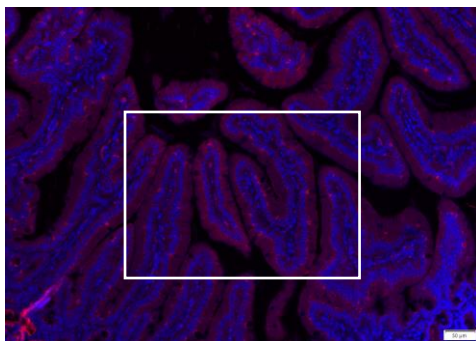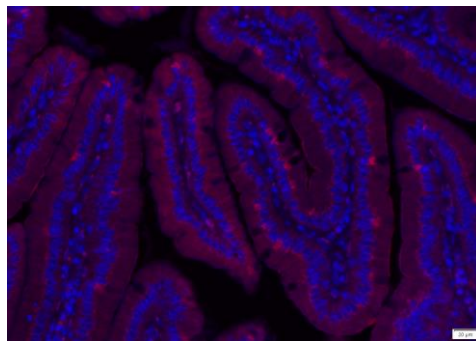

Female *Slc30a10*<sup>+/+</sup>

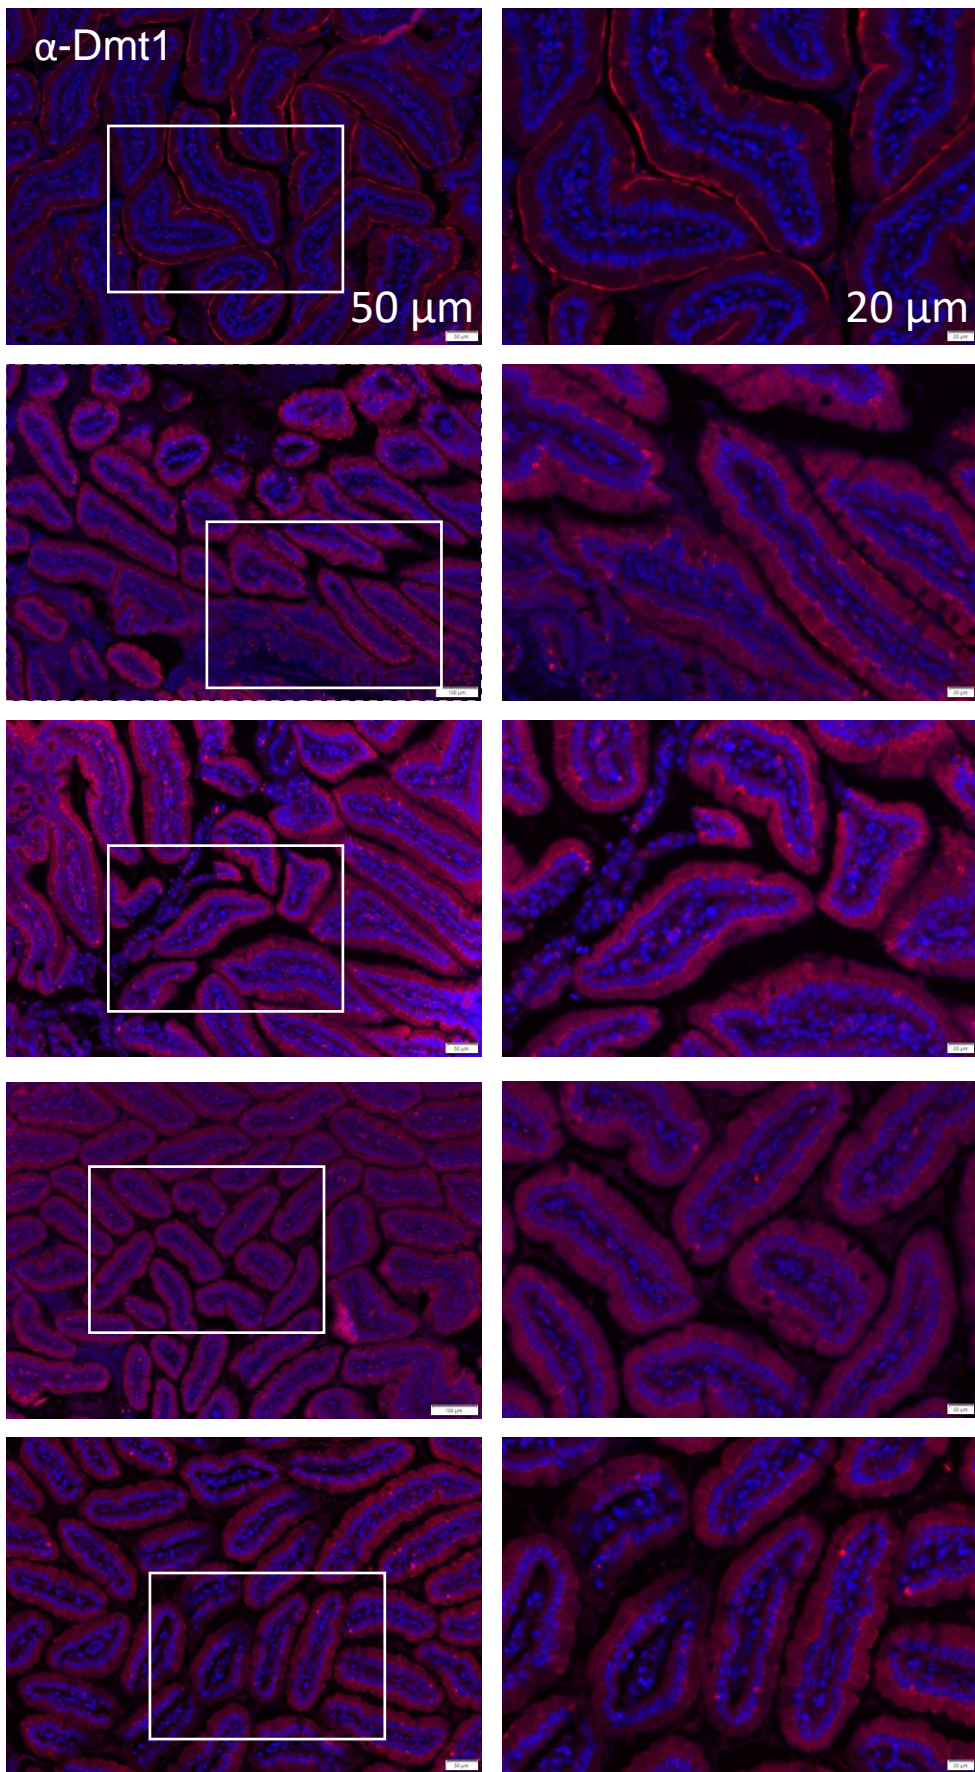

Male *Slc30a10*<sup>+/+</sup>

Figure S3

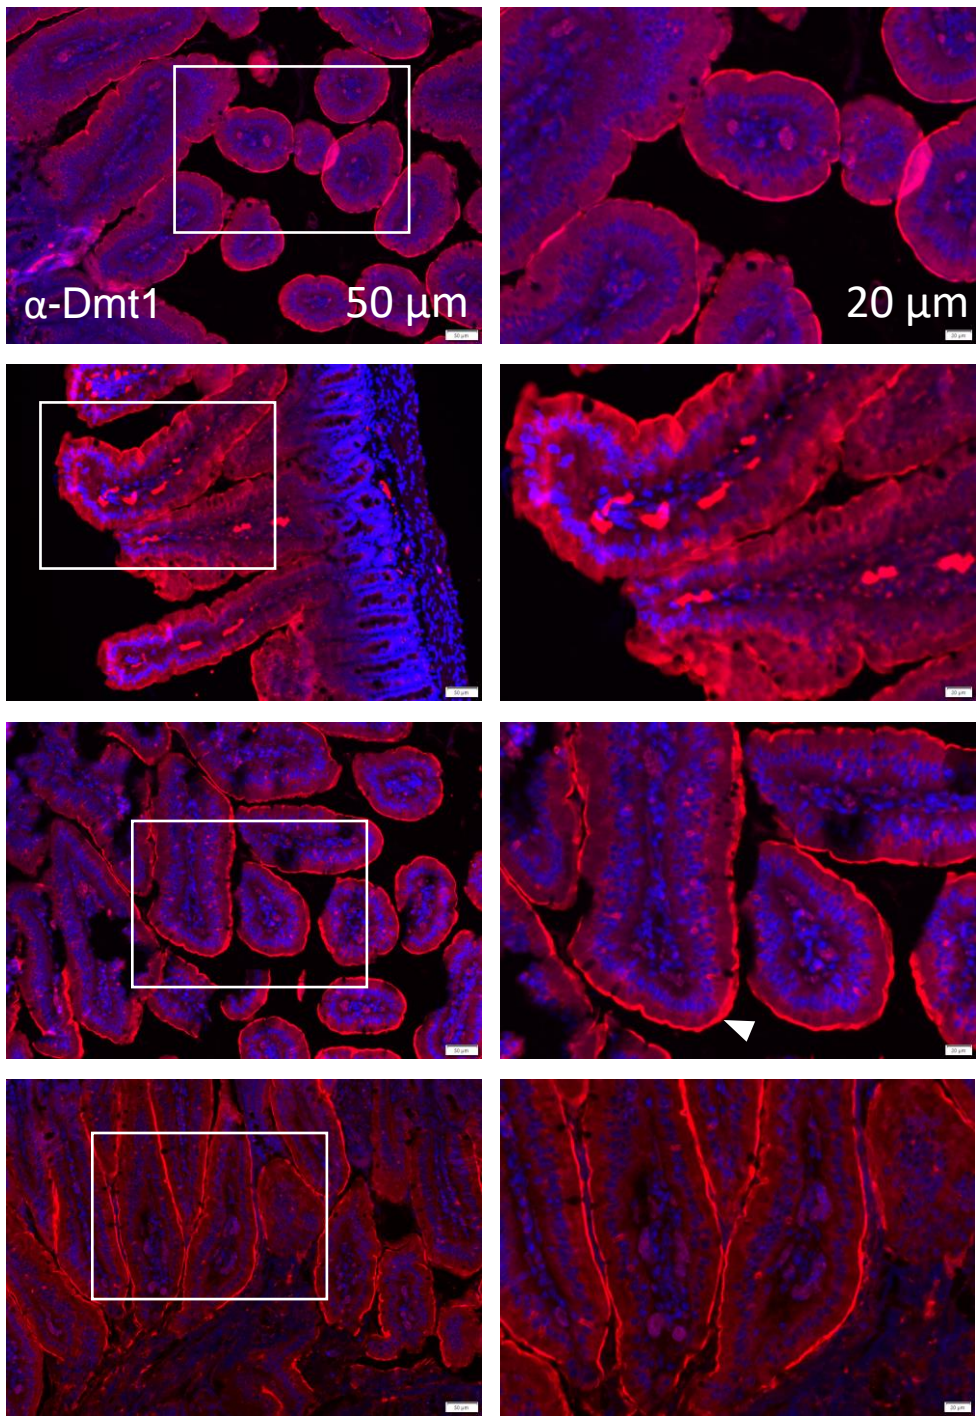

Female *Slc30a10*<sup>-/-</sup>

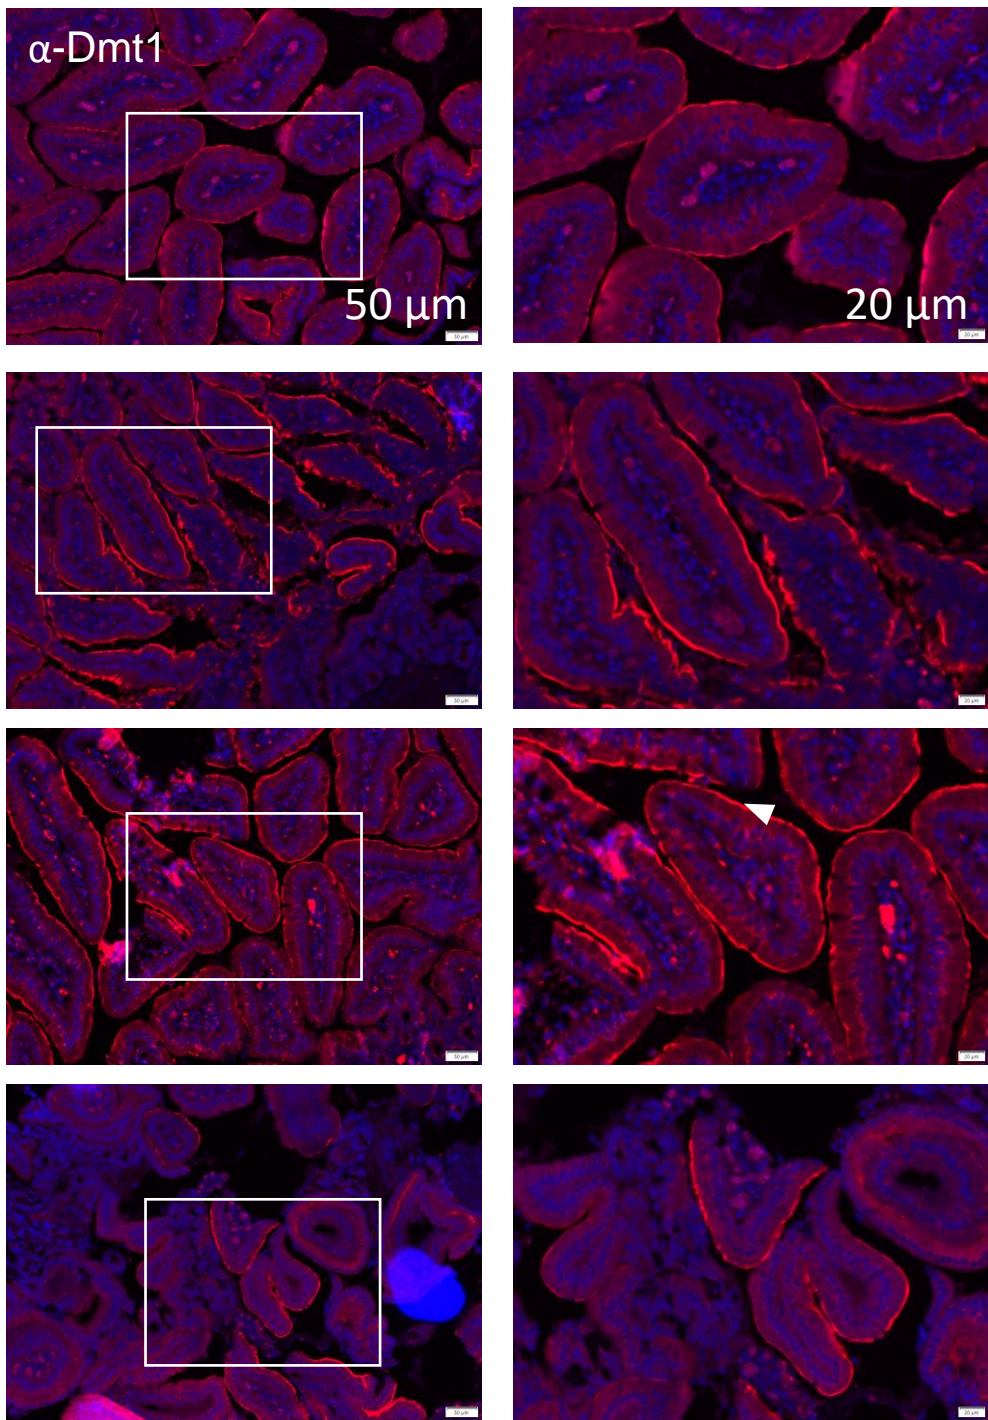

Male *Slc30a10*<sup>-/-</sup>

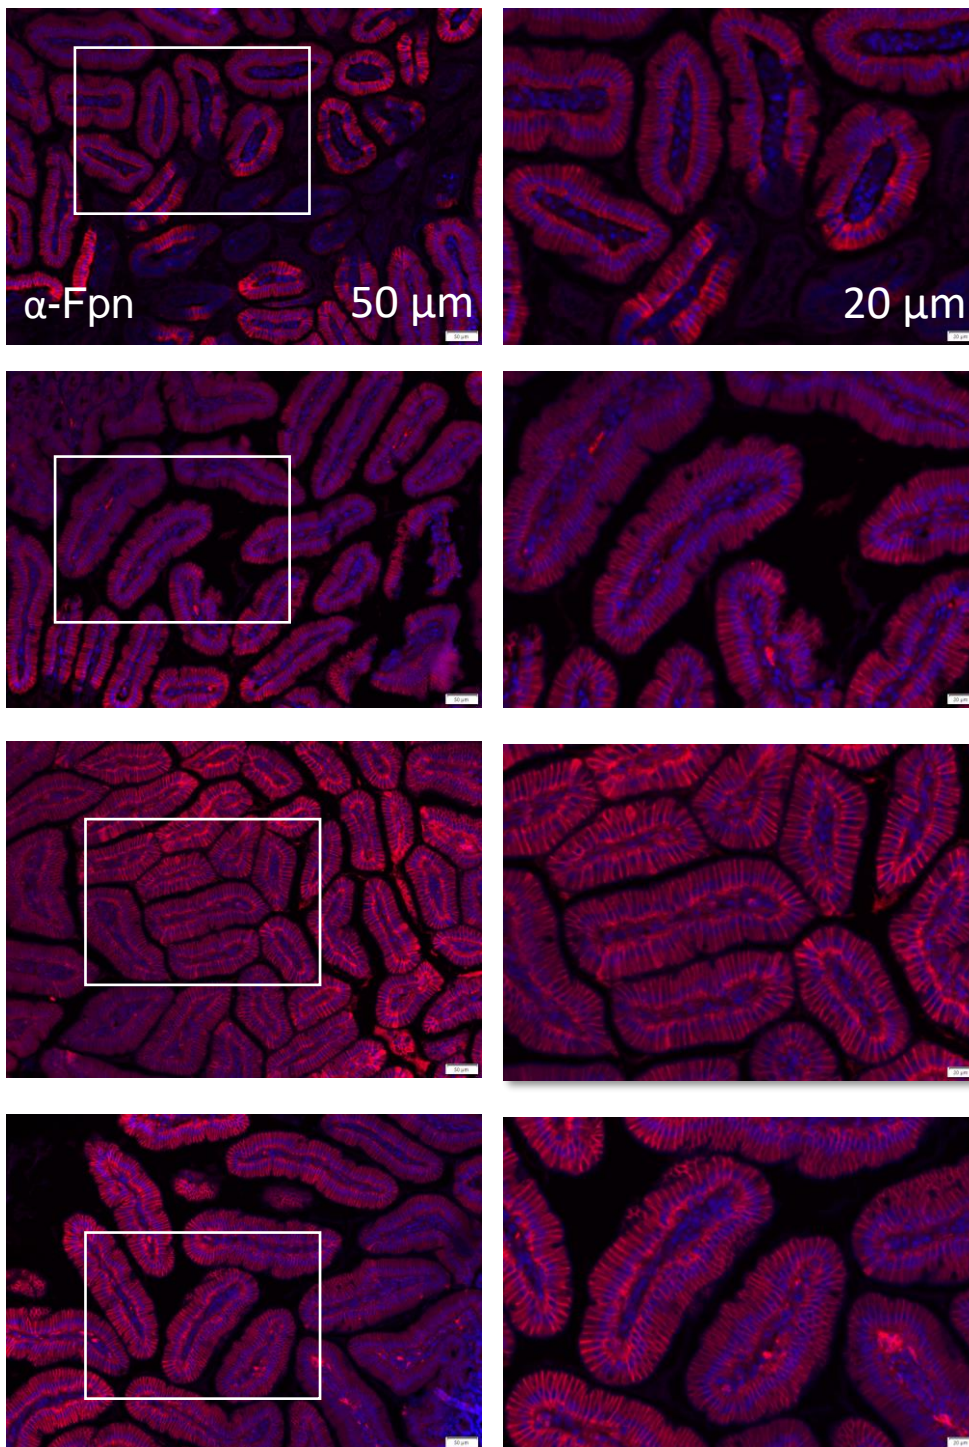

Female *Slc30a10*<sup>+/+</sup>

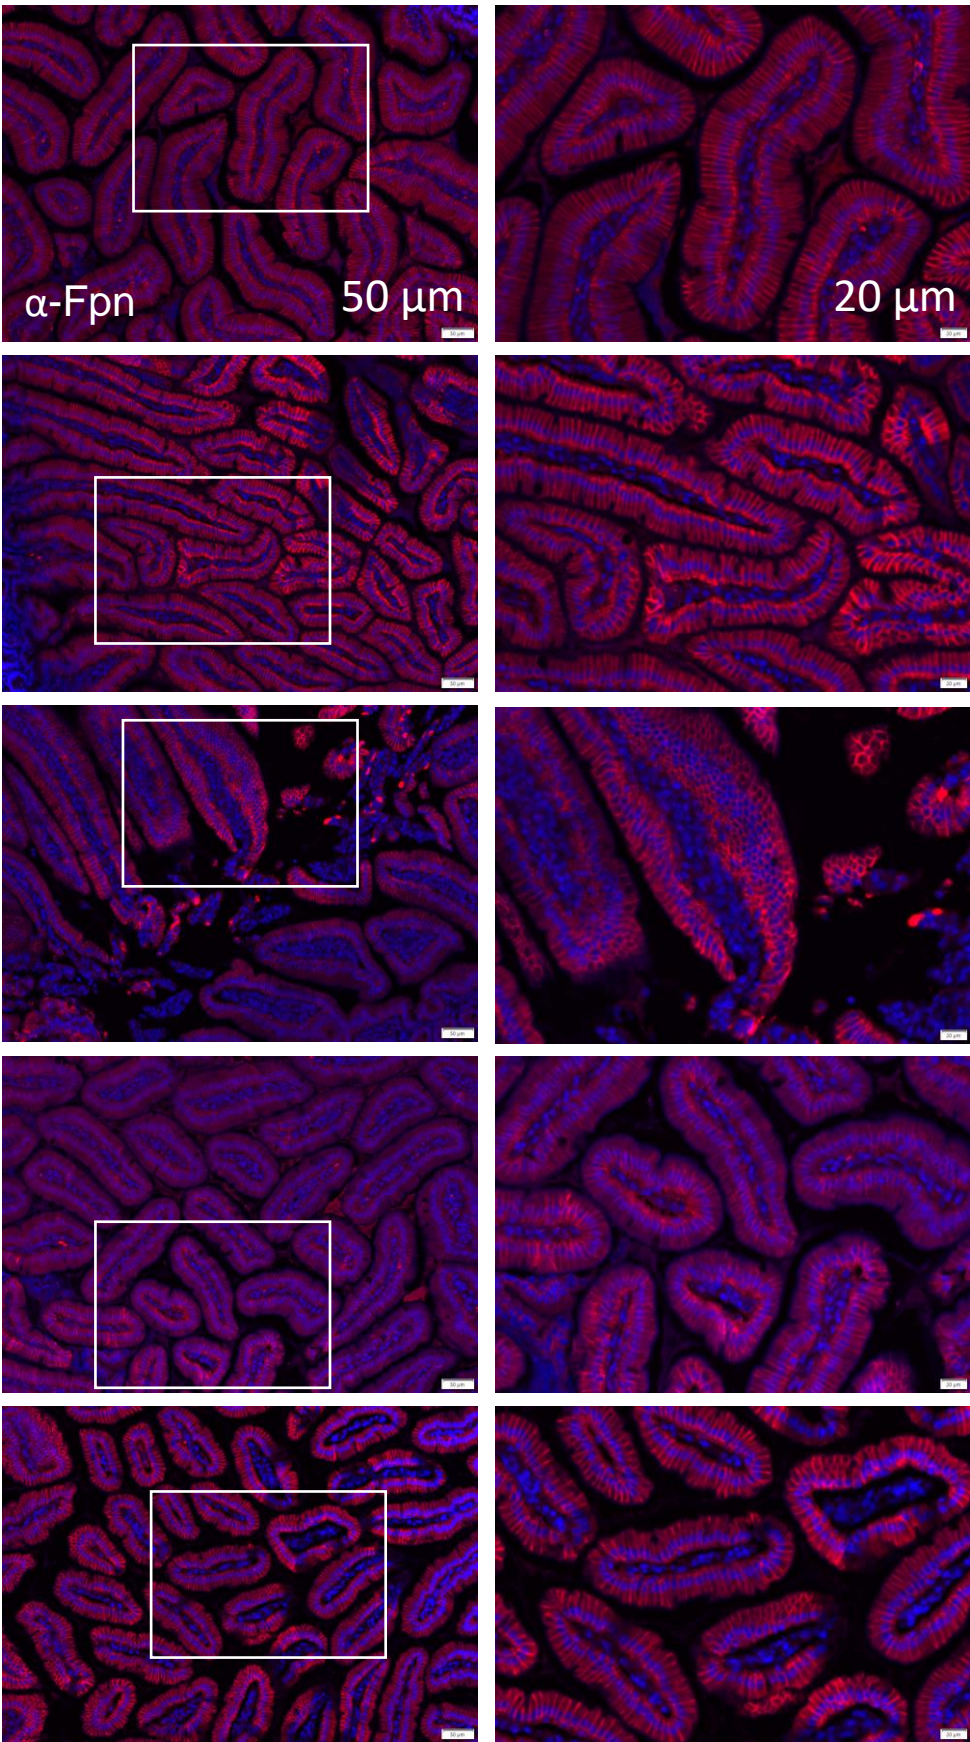

Male *Slc30a10*<sup>+/+</sup>

Figure S7

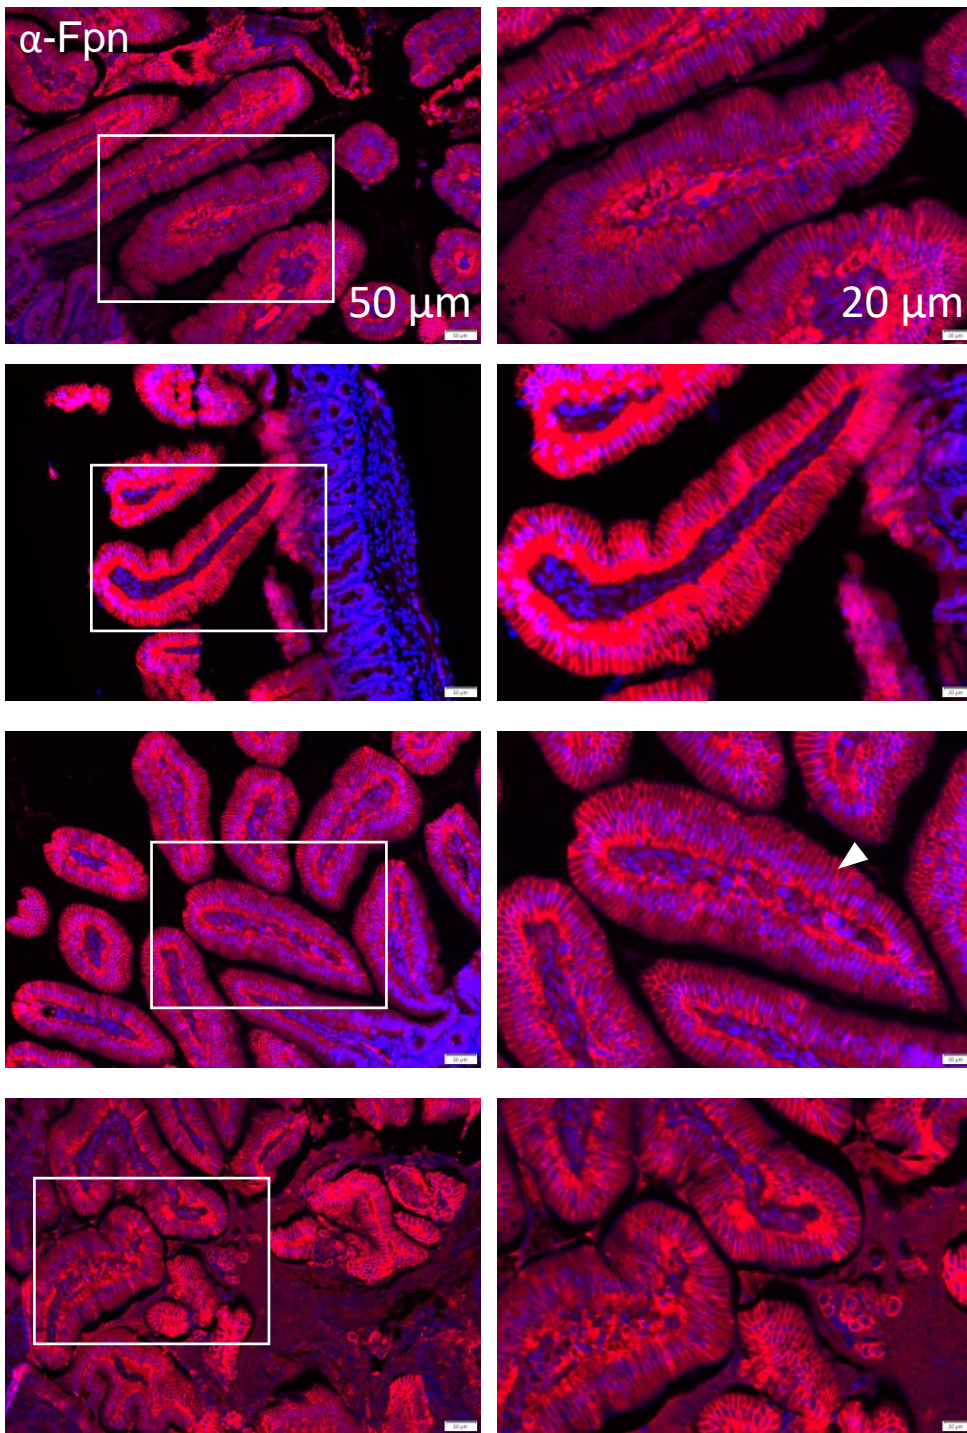



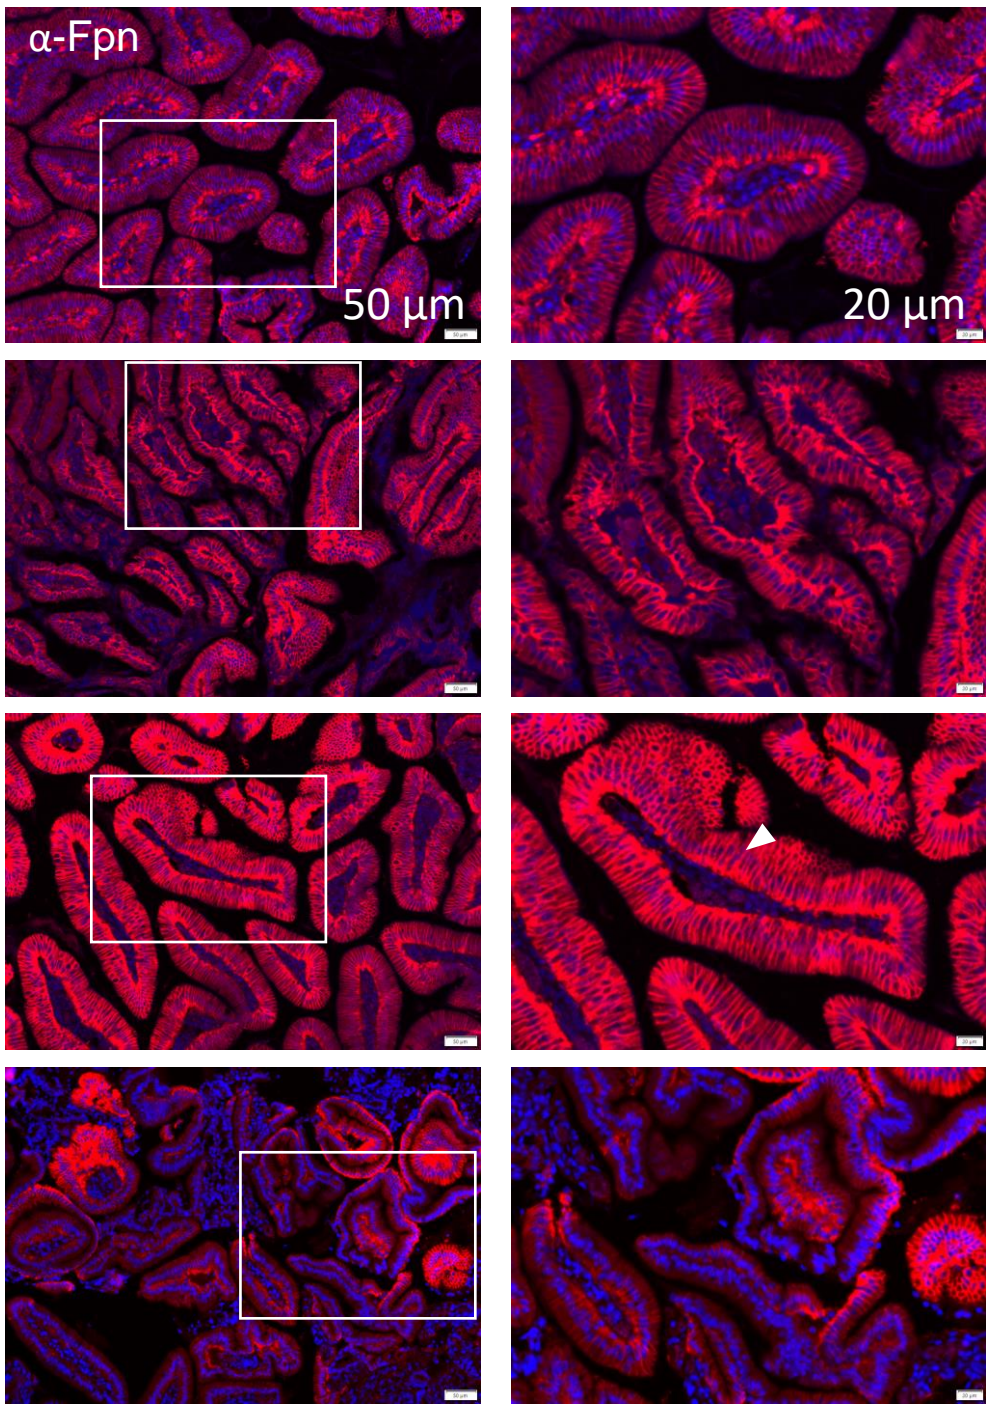

Male *Slc30a10*<sup>-/-</sup>



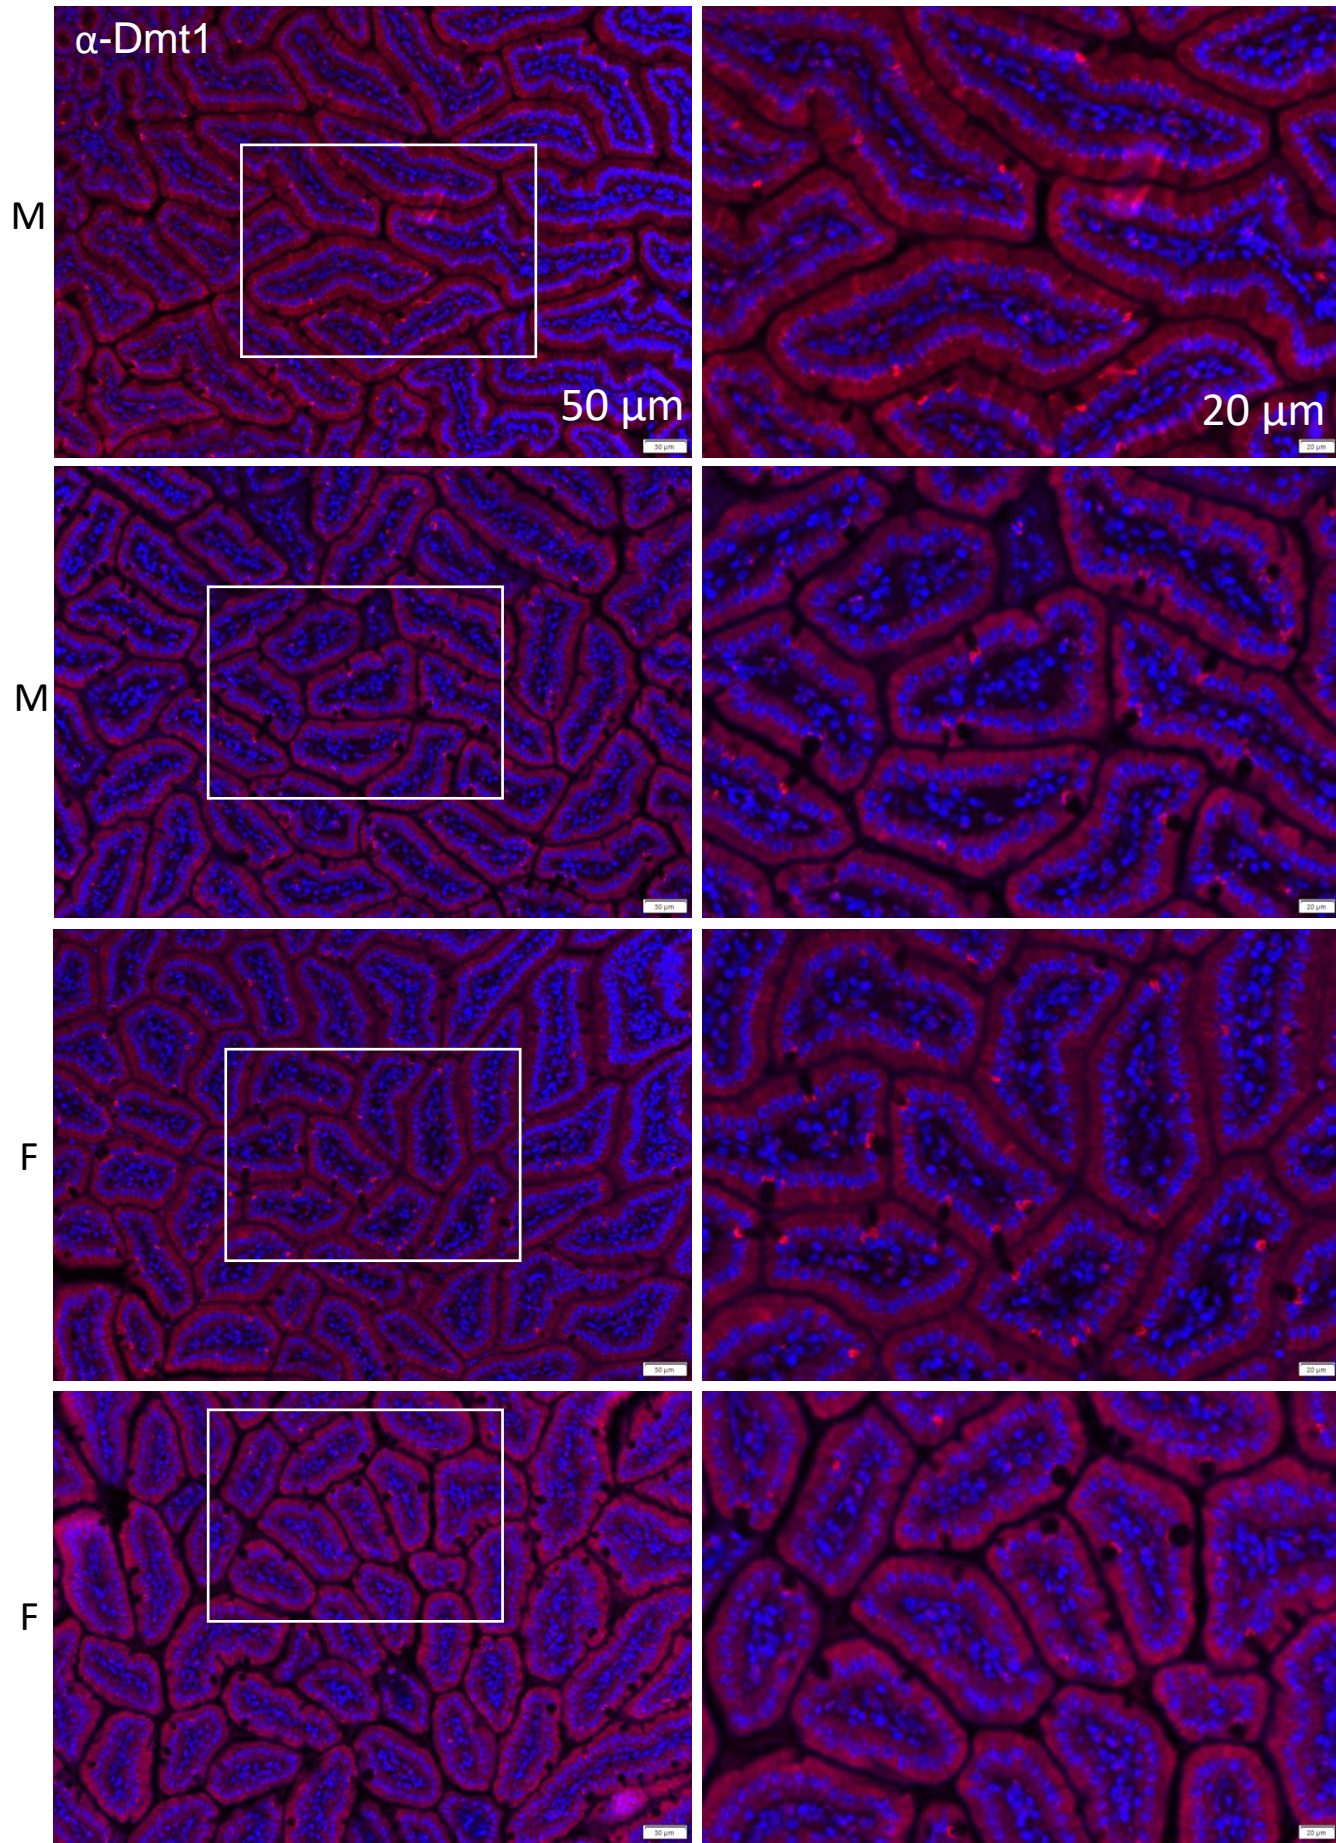

*Slc30a10*<sup>+/+</sup> *Dmt1*<sup>fl/fl</sup>

Figure S11

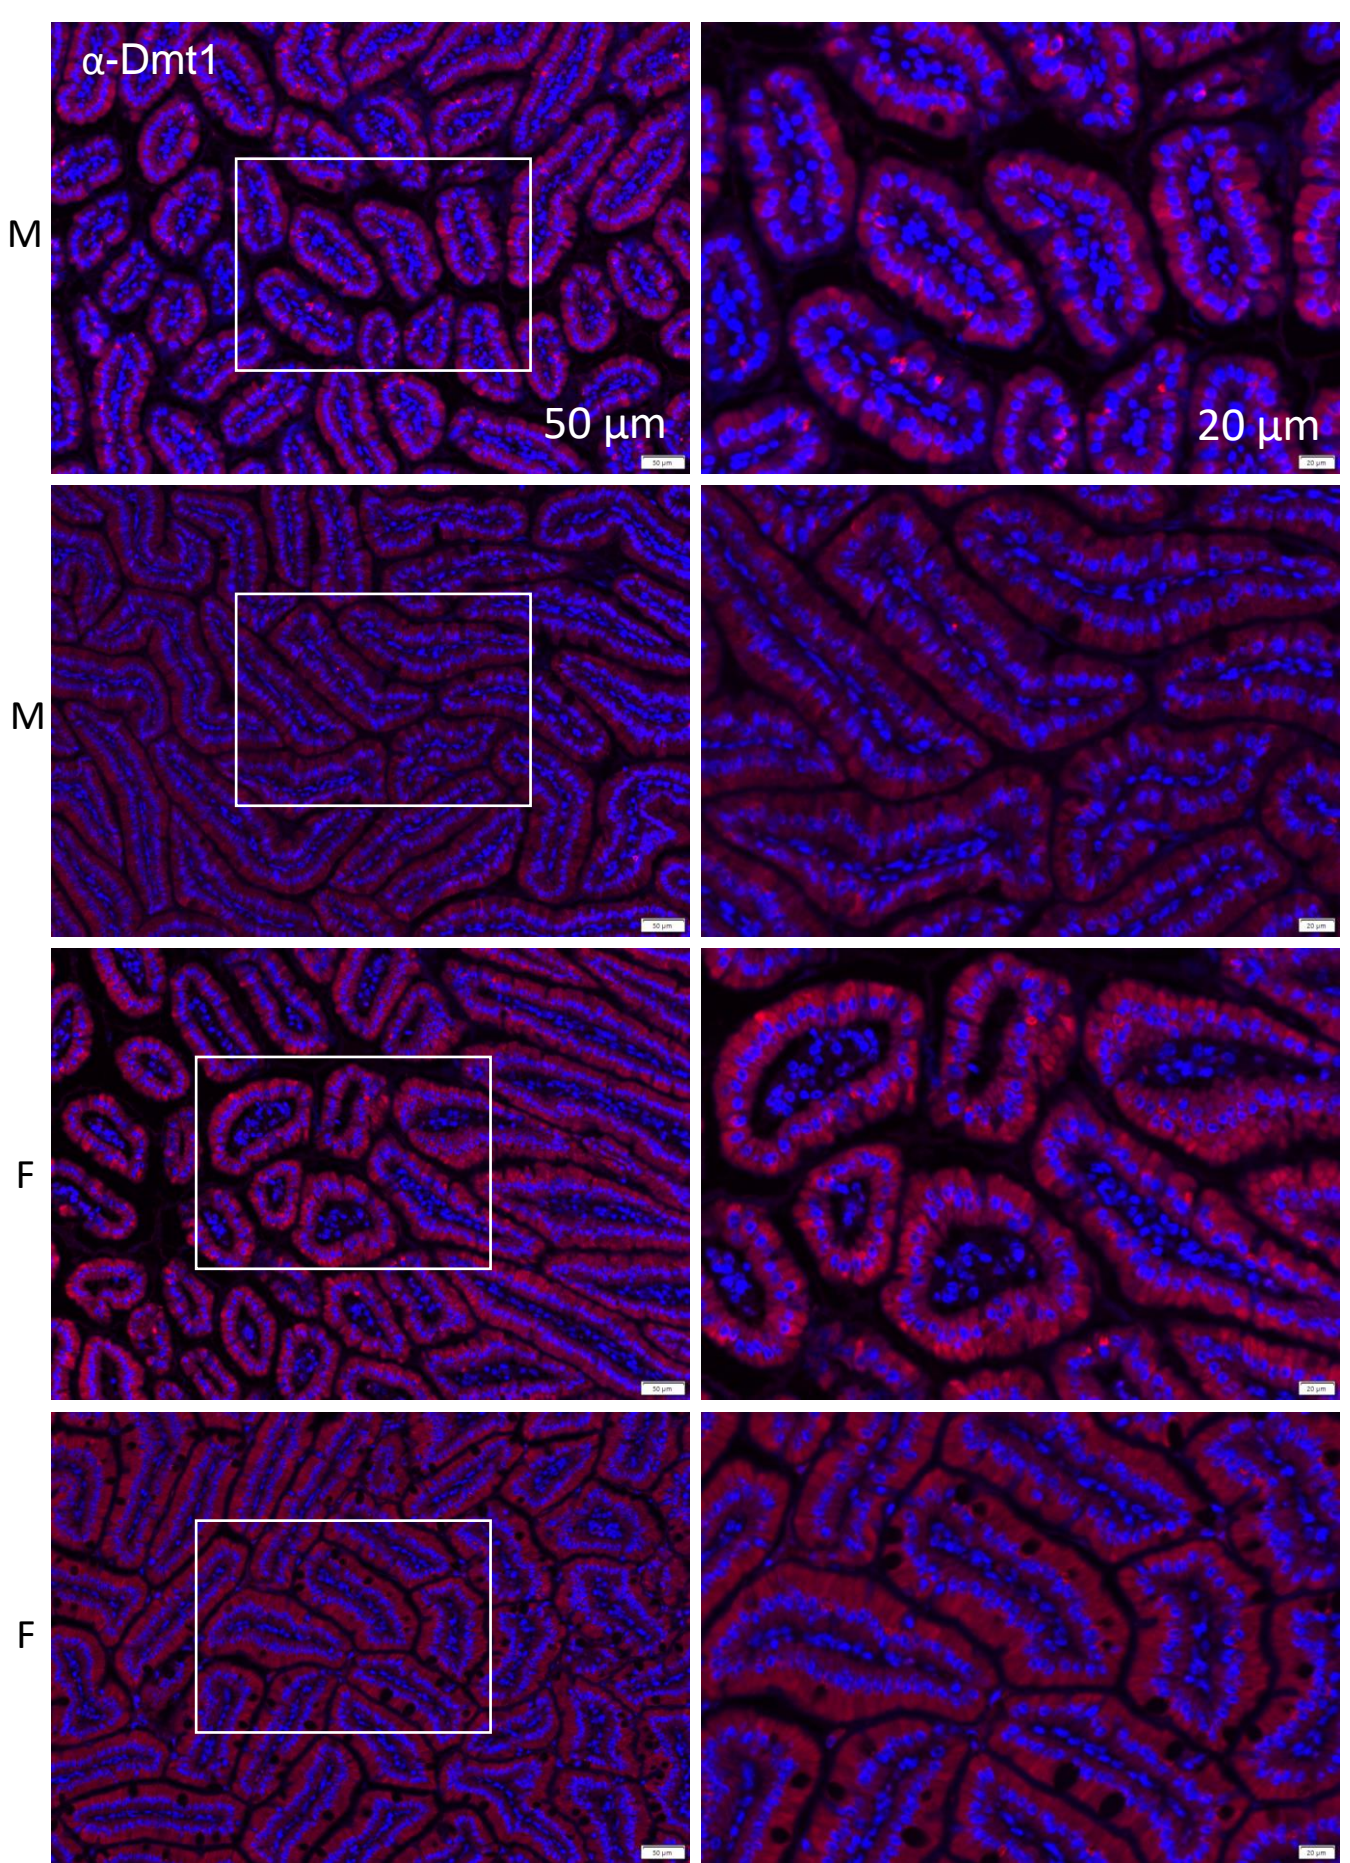

*Slc30a10*<sup>+/+</sup> *Dmt1*<sup>fl/fl</sup> Vil-Ert2

Figure S12

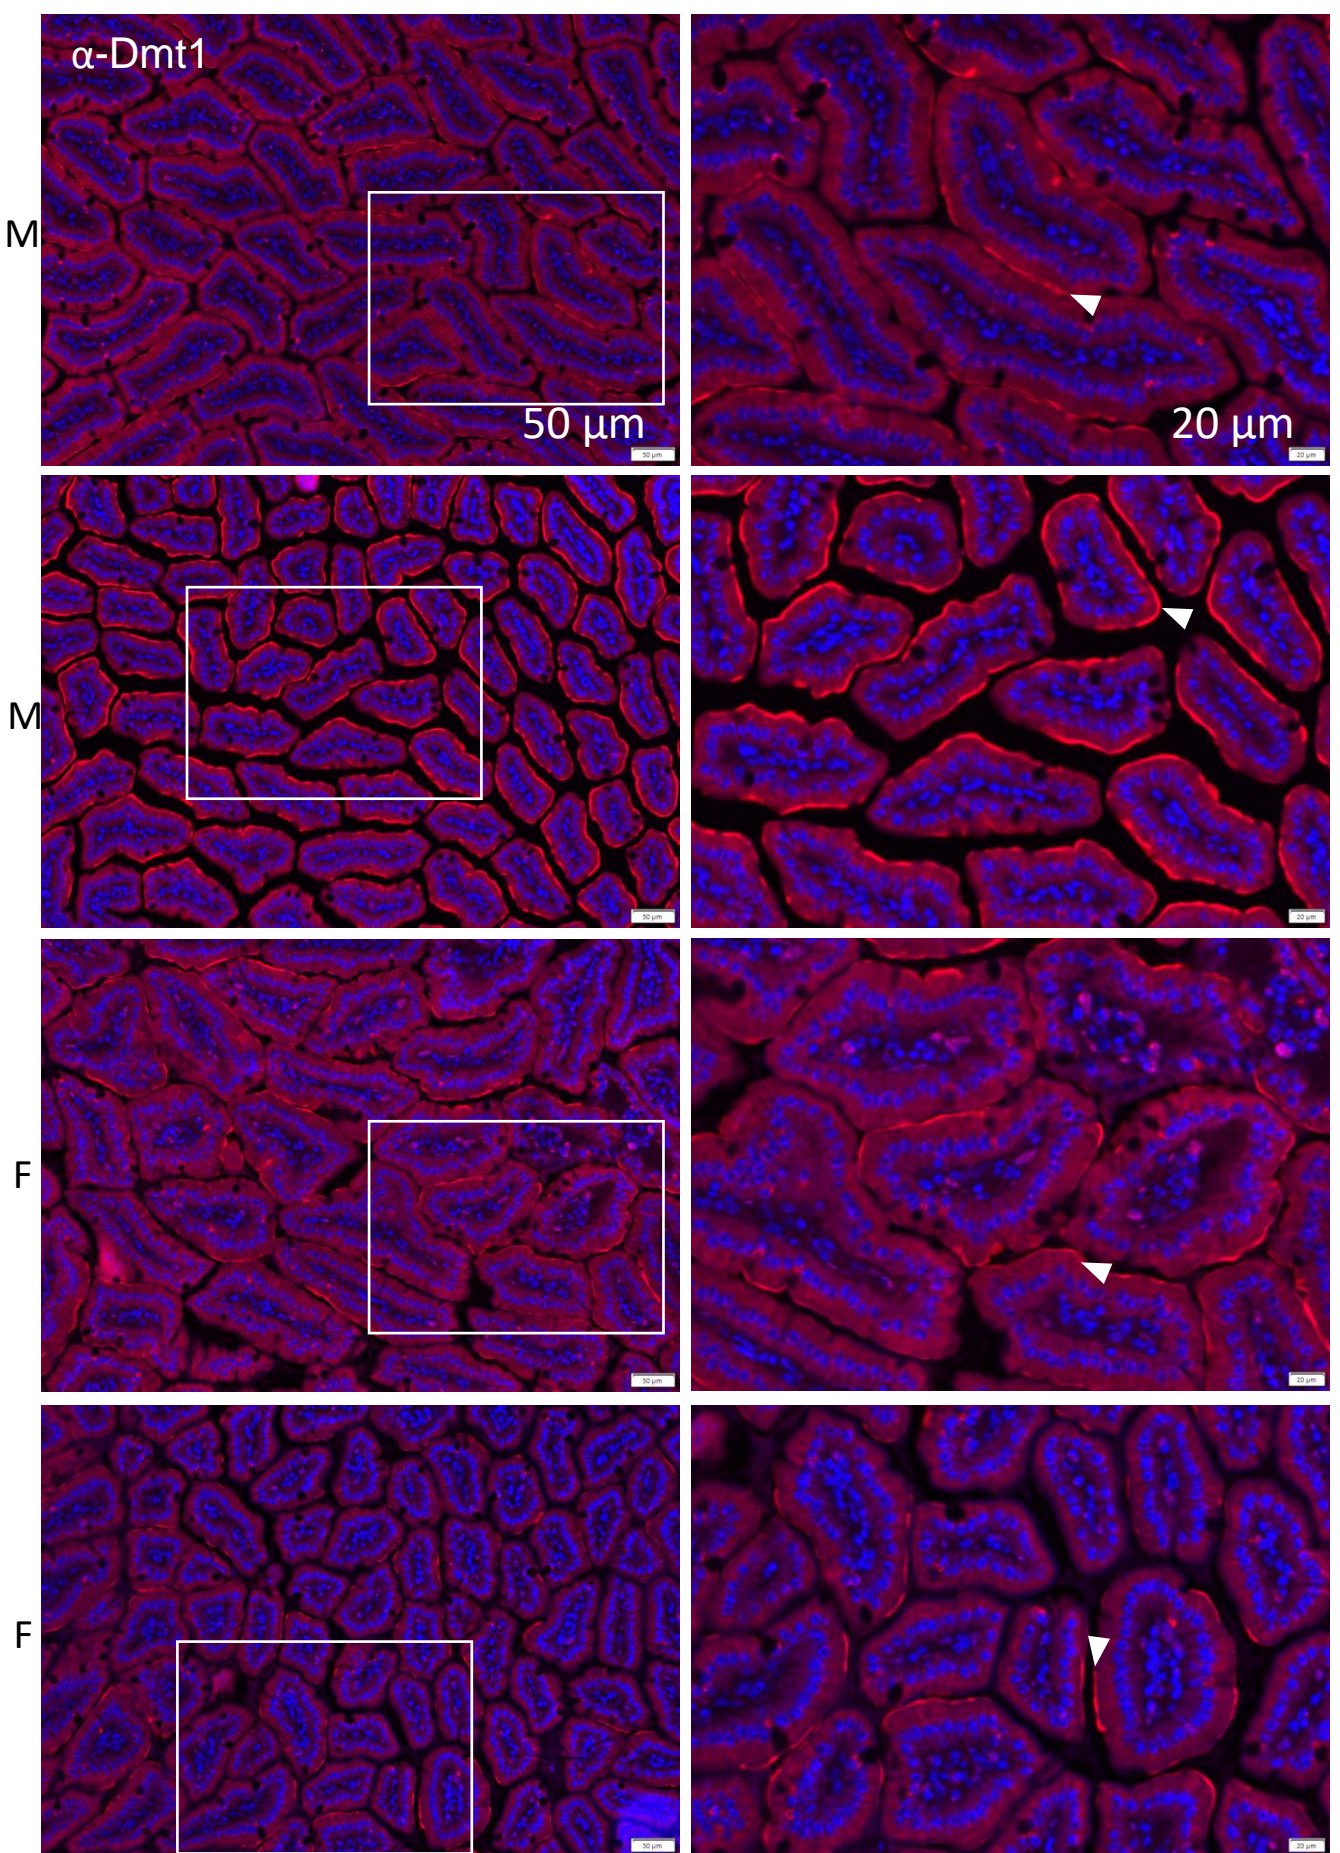

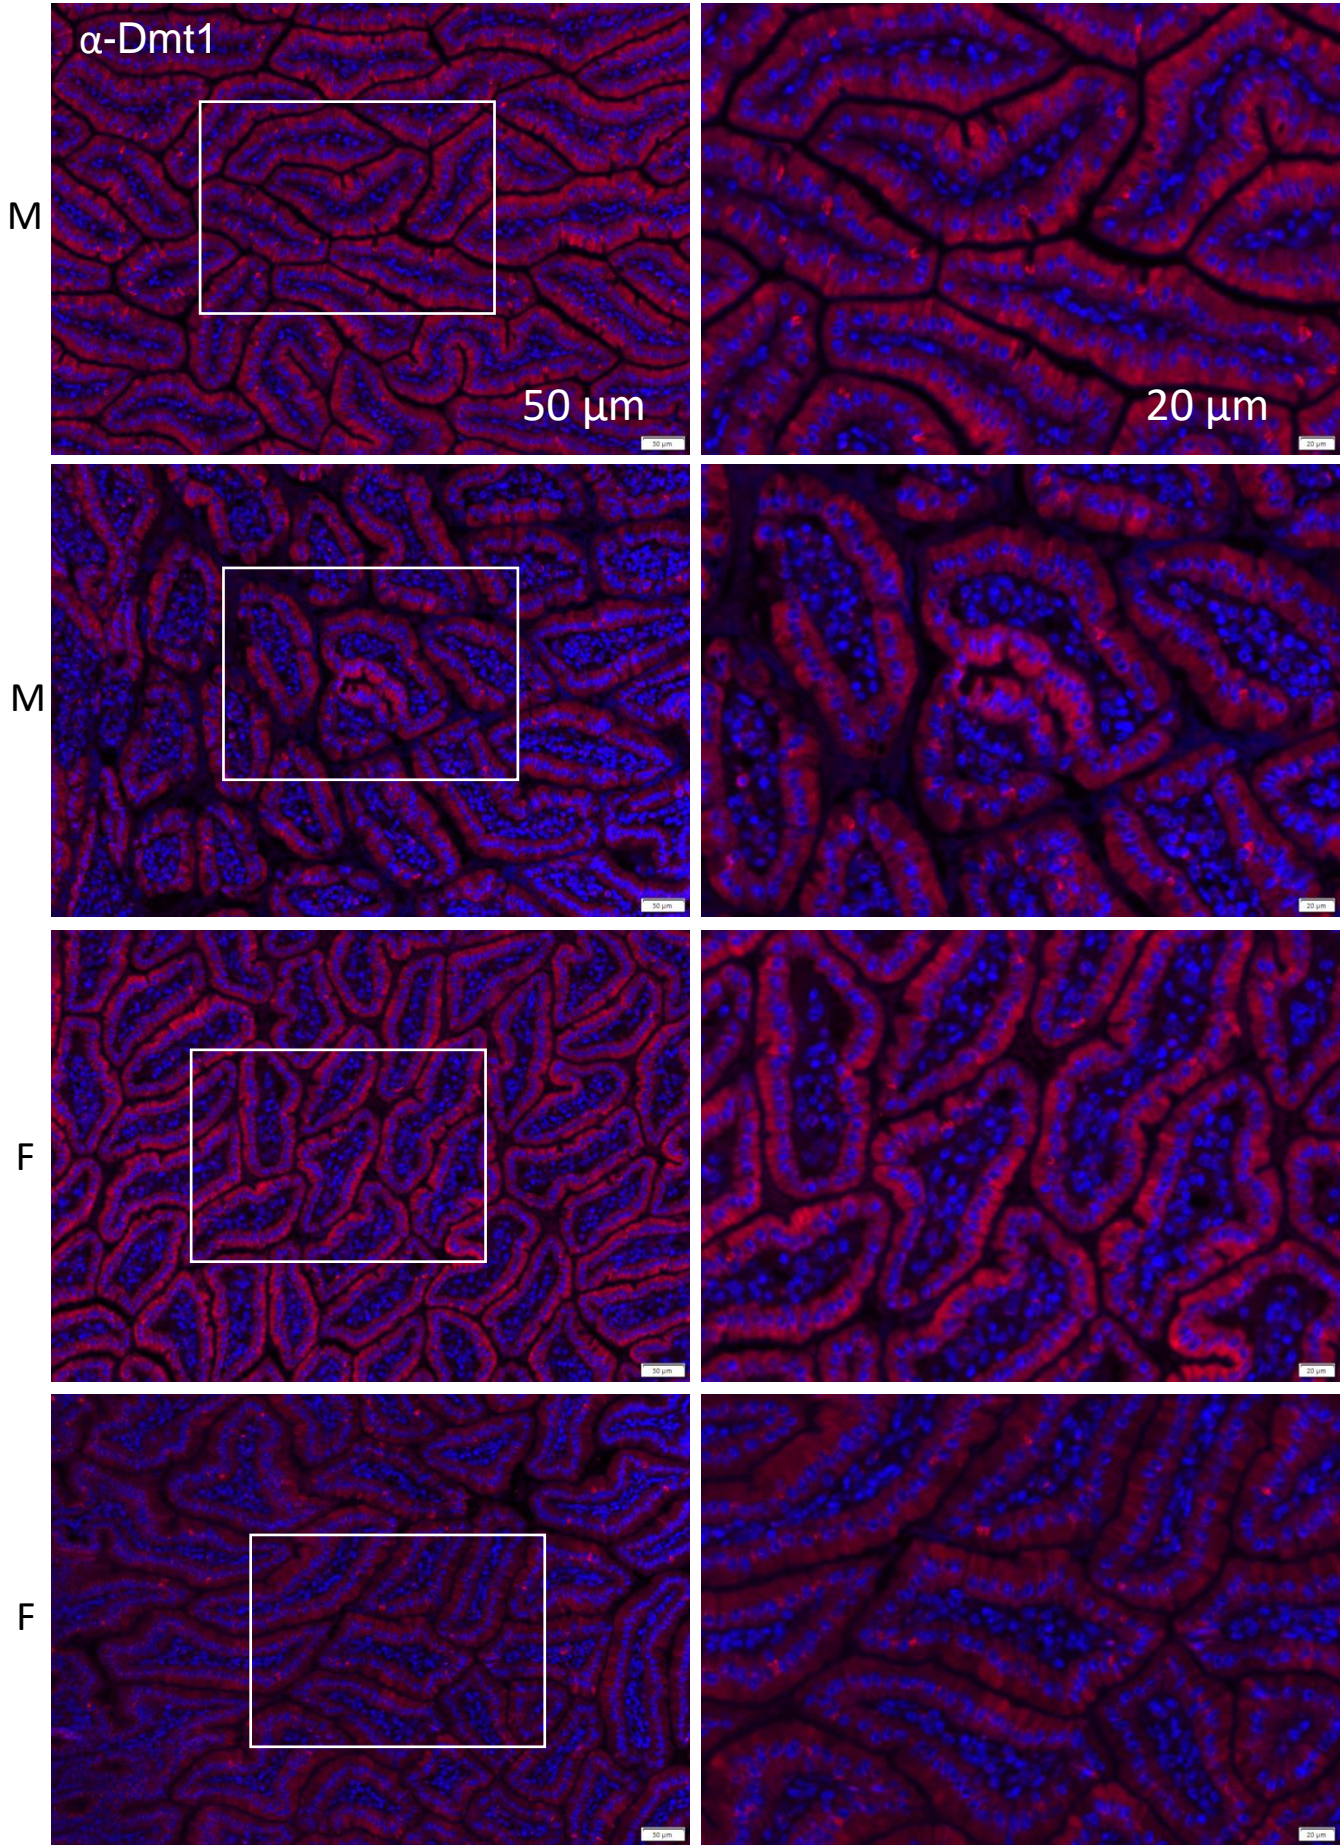

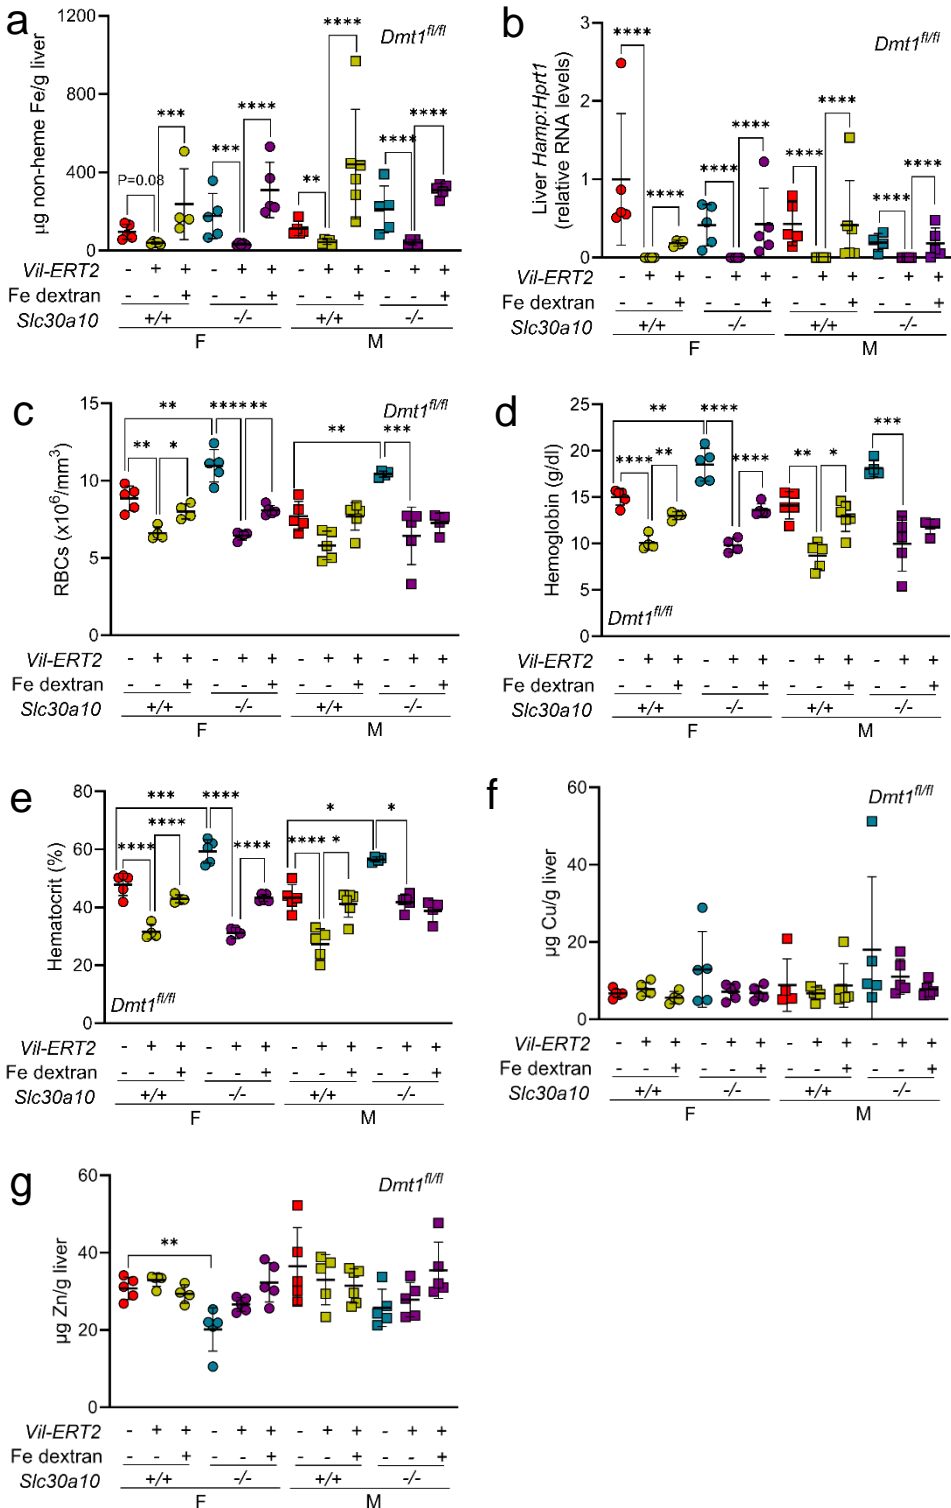

Figure S15

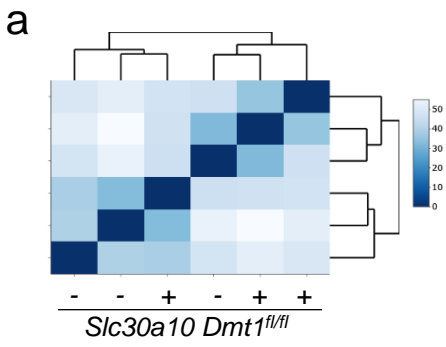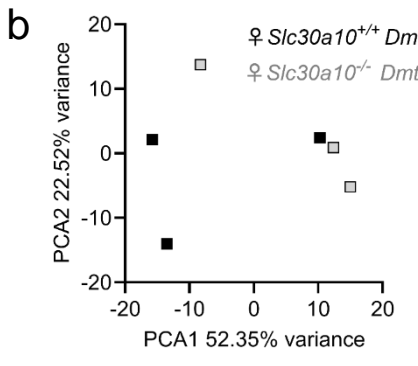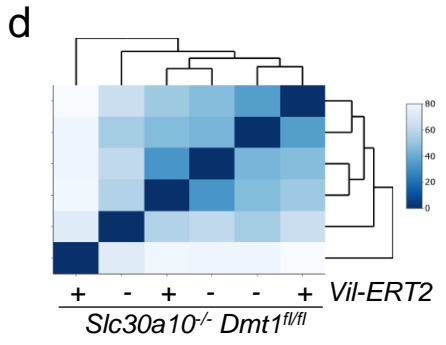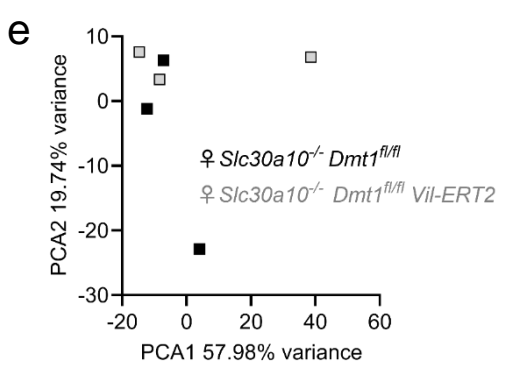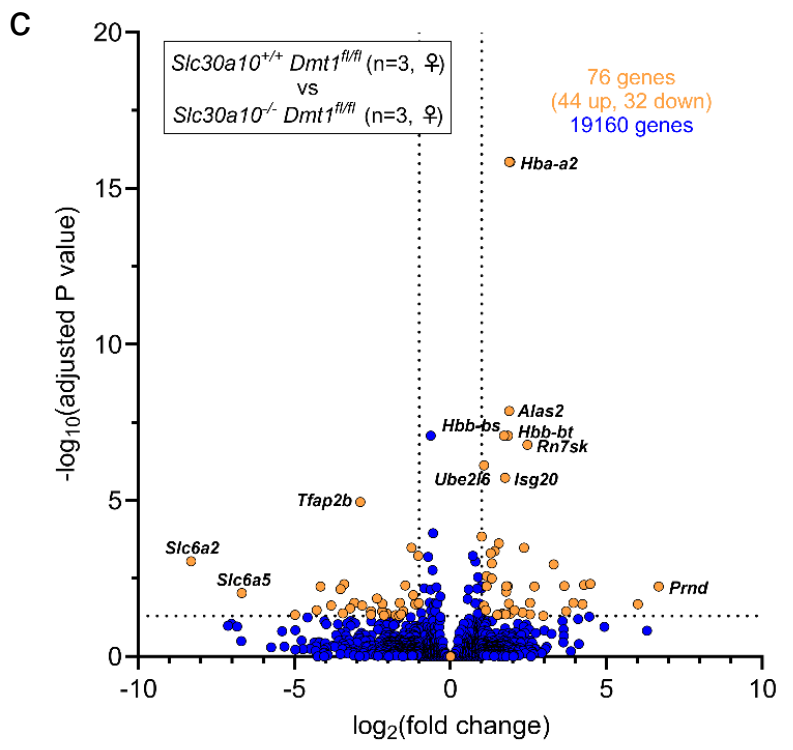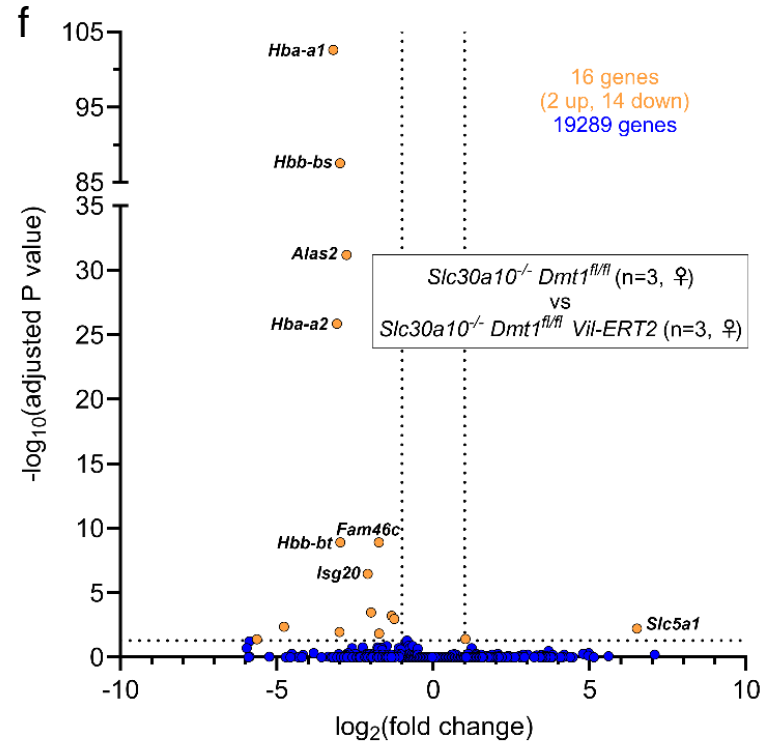

Figure S16



*Slc30a10*<sup>+/+</sup> *Dmt1*<sup>fl/fl</sup>  
vs.  
*Slc30a10*<sup>-/-</sup> *Dmt1*<sup>fl/fl</sup>

*Slc30a10*<sup>-/-</sup> *Dmt1*<sup>fl/fl</sup>  
vs.  
*Slc30a10*<sup>-/-</sup> *Dmt1*<sup>fl/fl</sup>  
*Vil-ERT2*

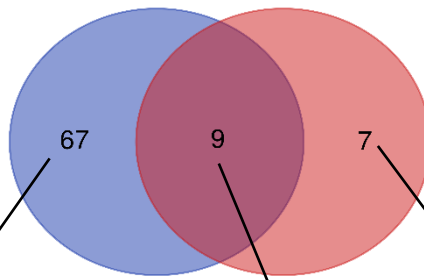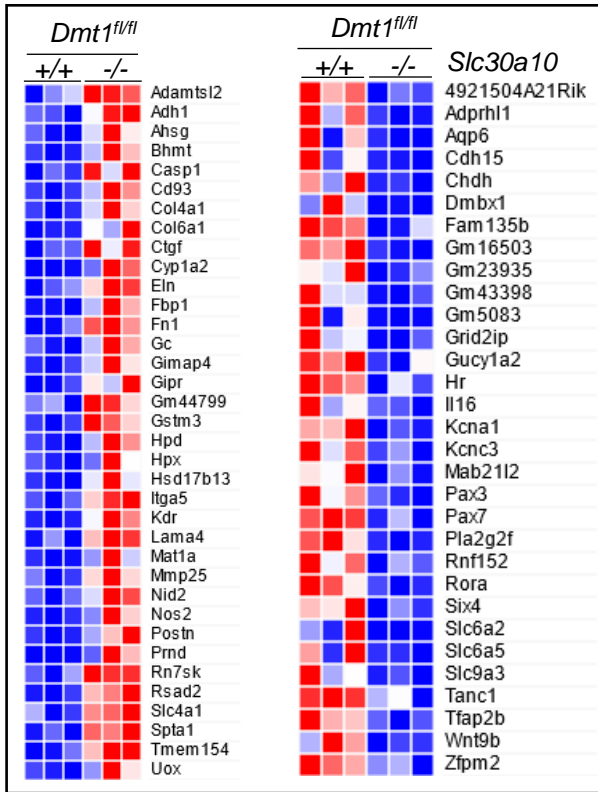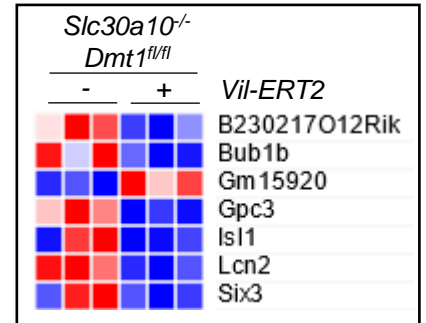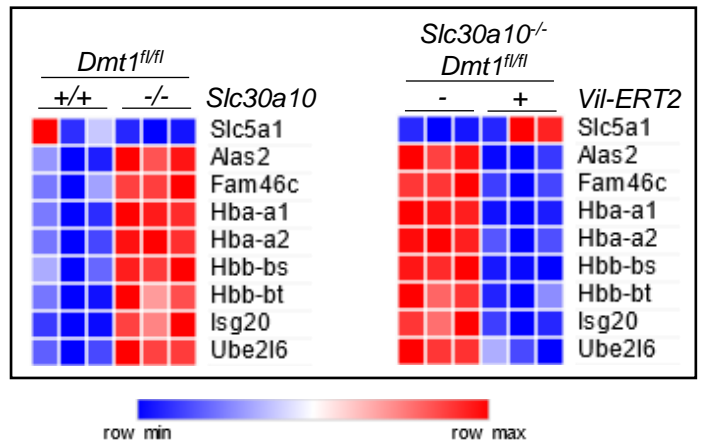

Figure S17

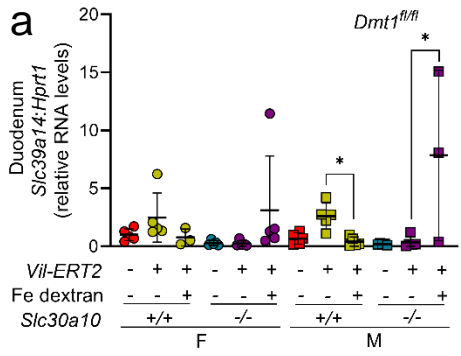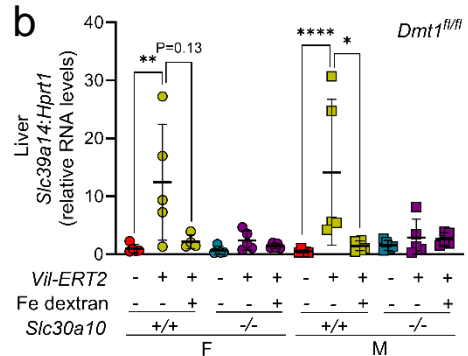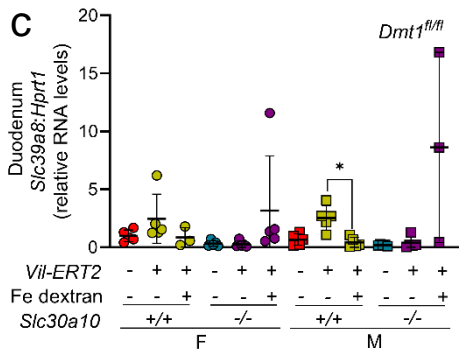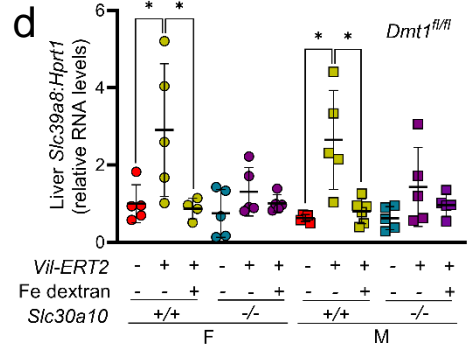

Figure S18

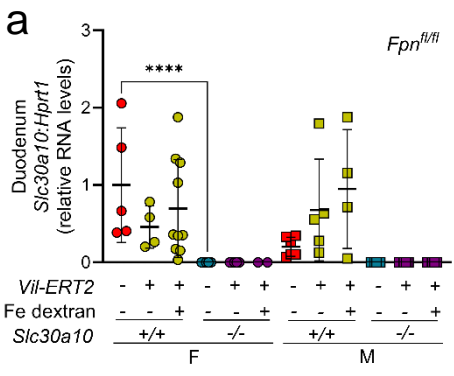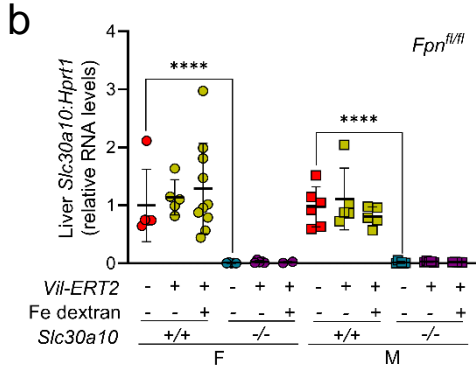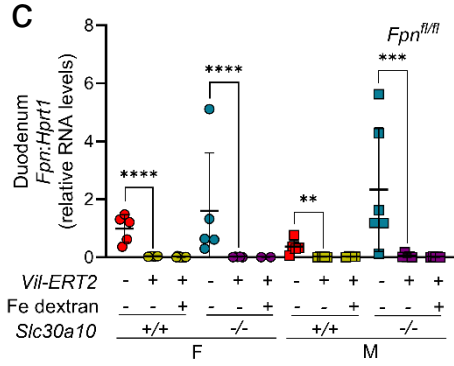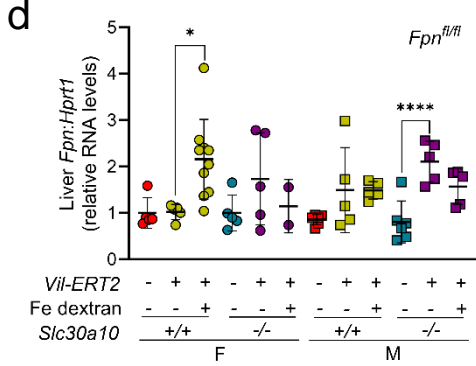

Figure S19

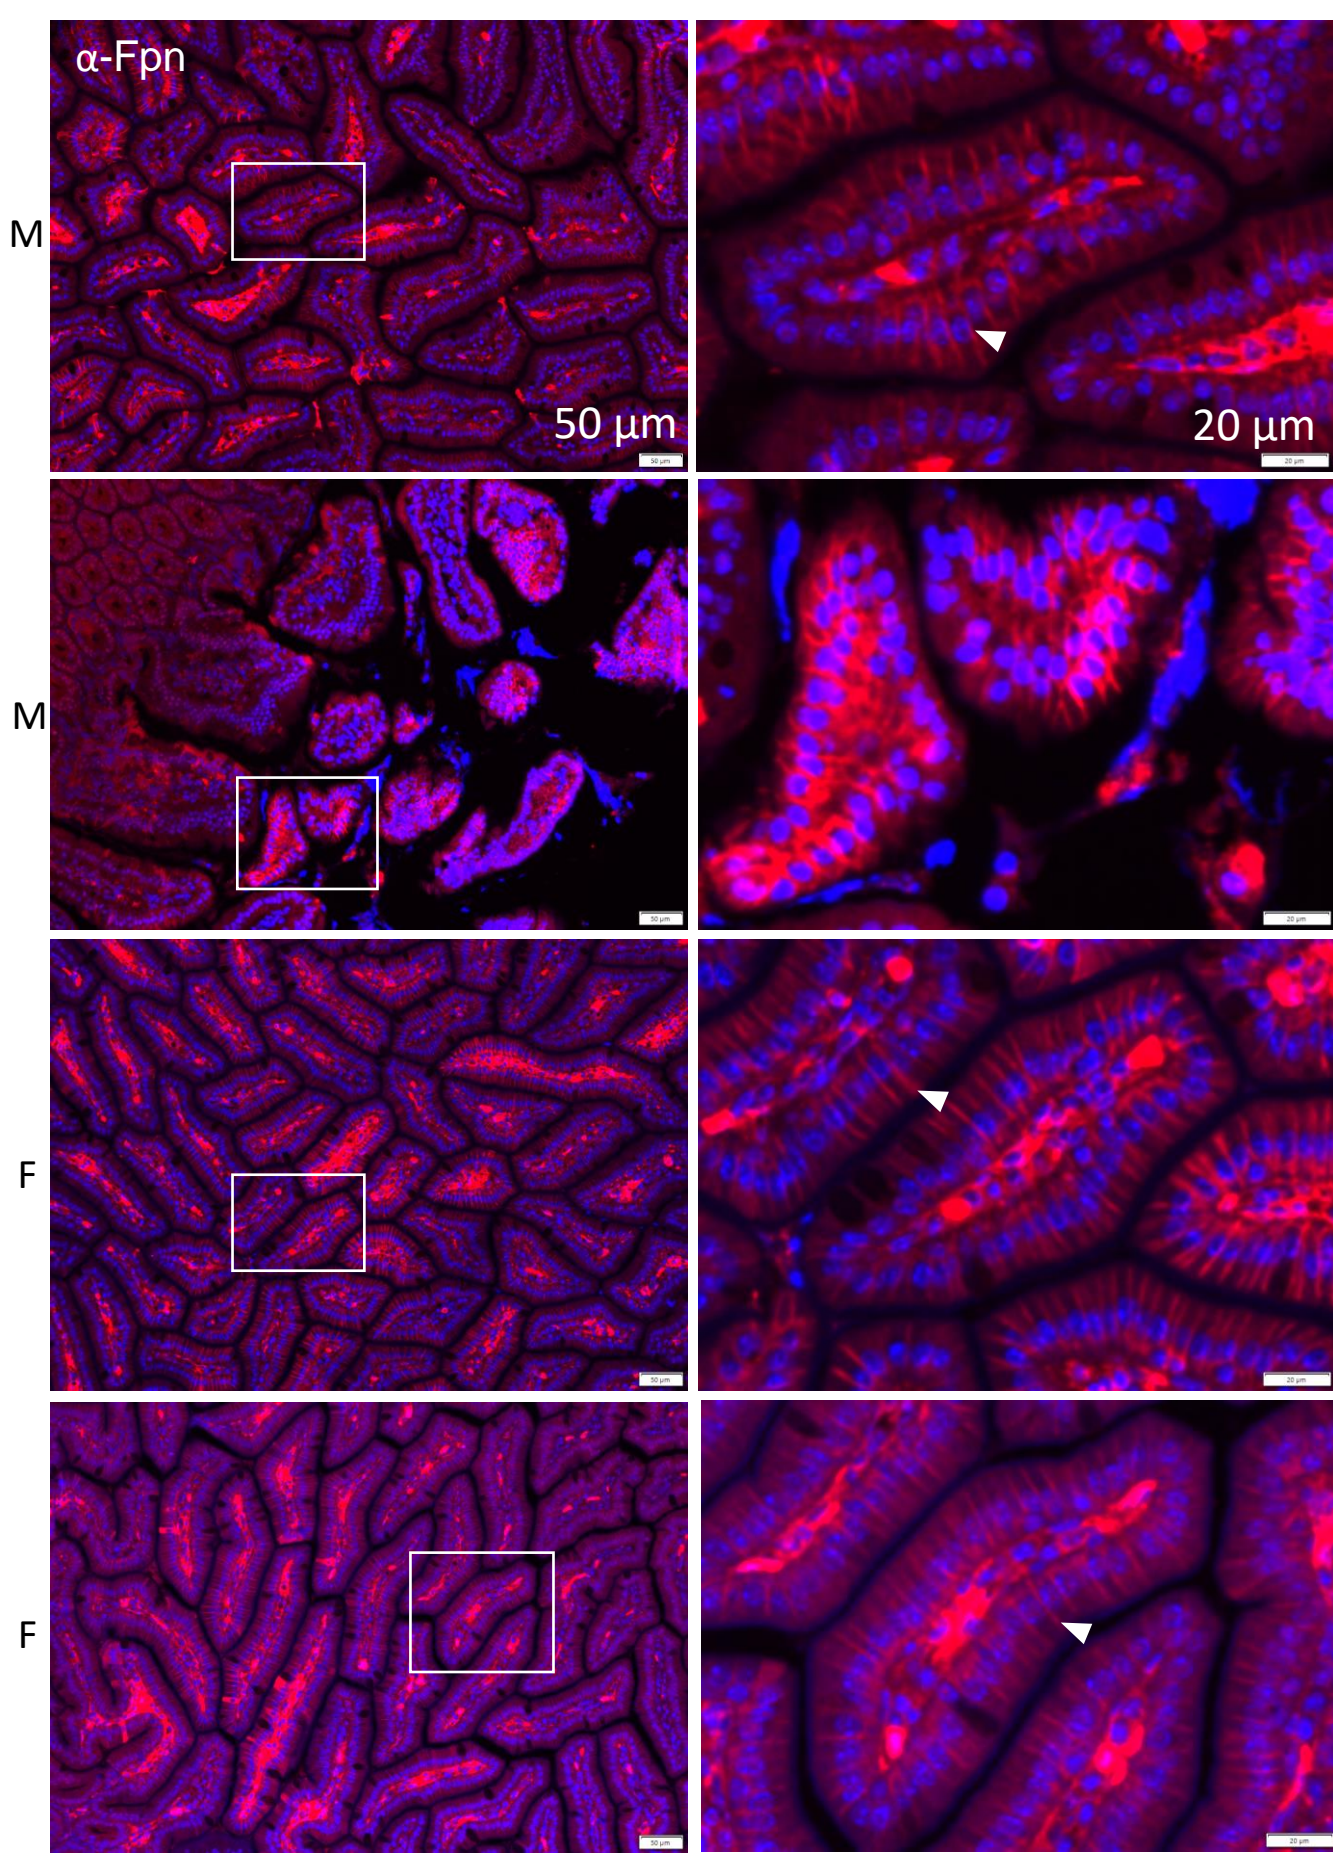

*Slc30a10*<sup>+/+</sup> *Fpn*<sup>fl/fl</sup>

Figure S20

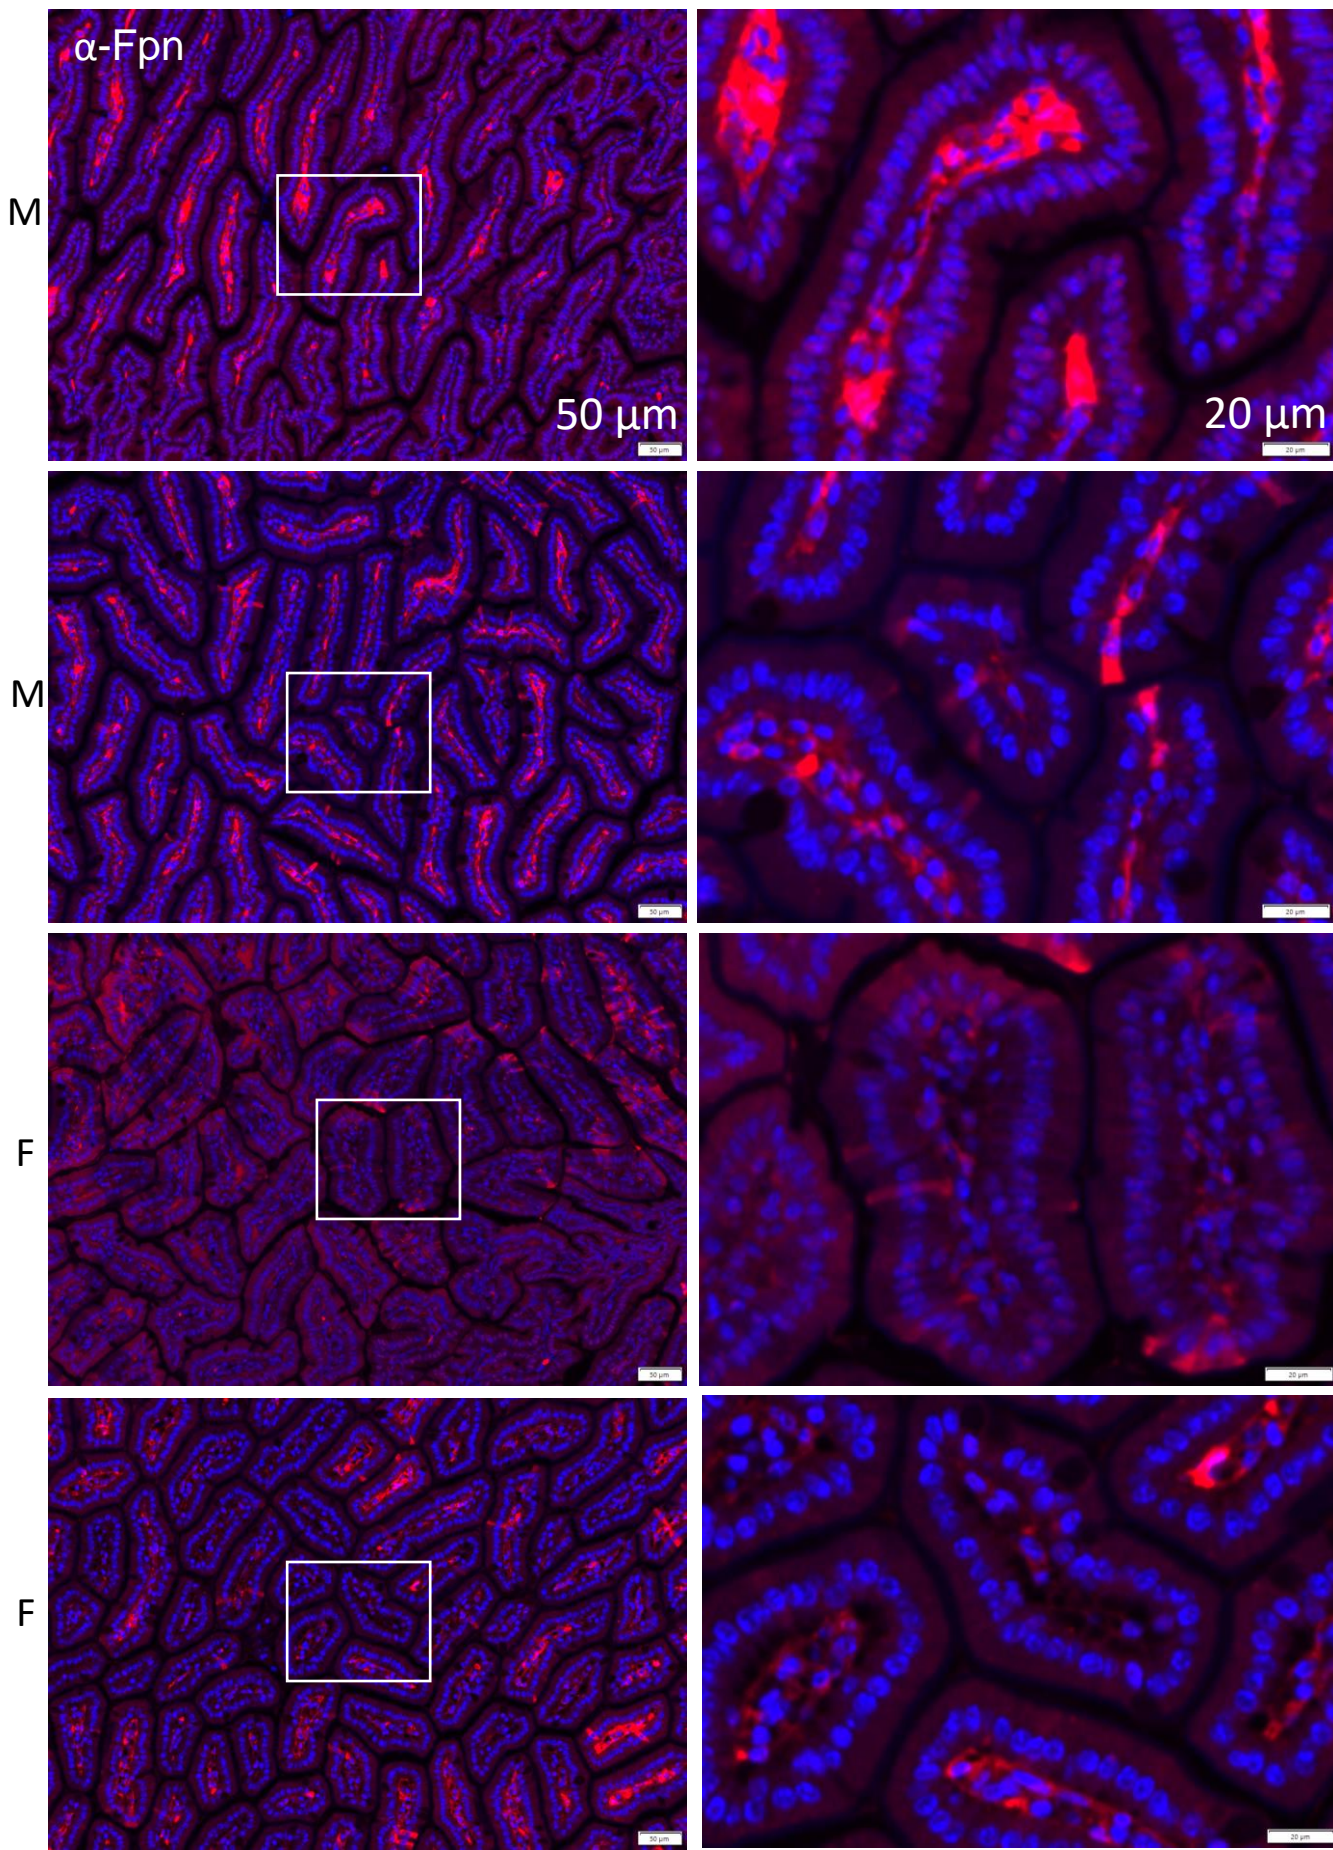

*Slc30a10*<sup>+/+</sup> *Fpn*<sup>fl/fl</sup> *Vil-ERT2*

Figure S21

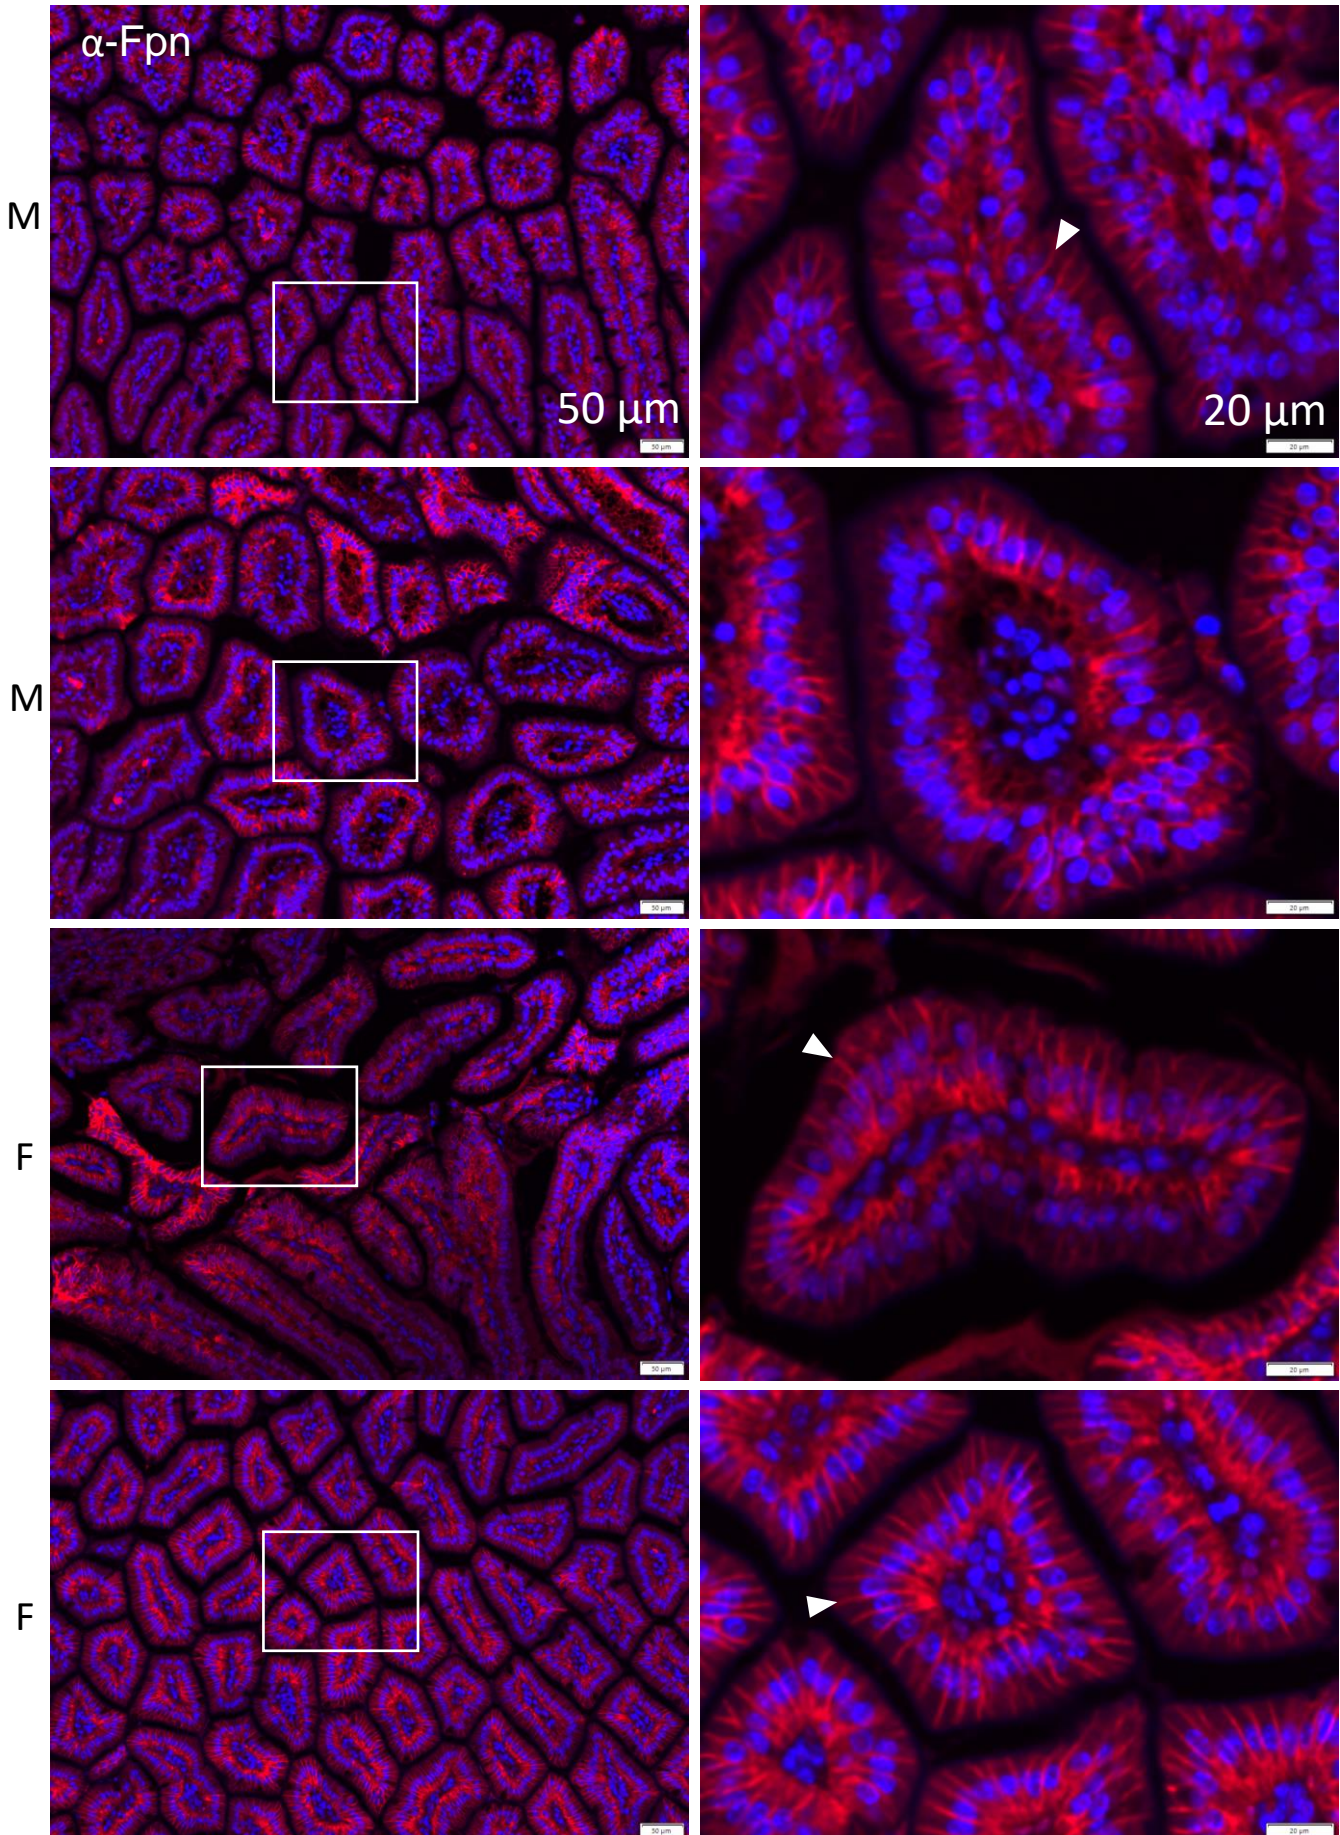

*Slc30a10*<sup>-/-</sup> *Fpn*<sup>fl/fl</sup>

Figure S22

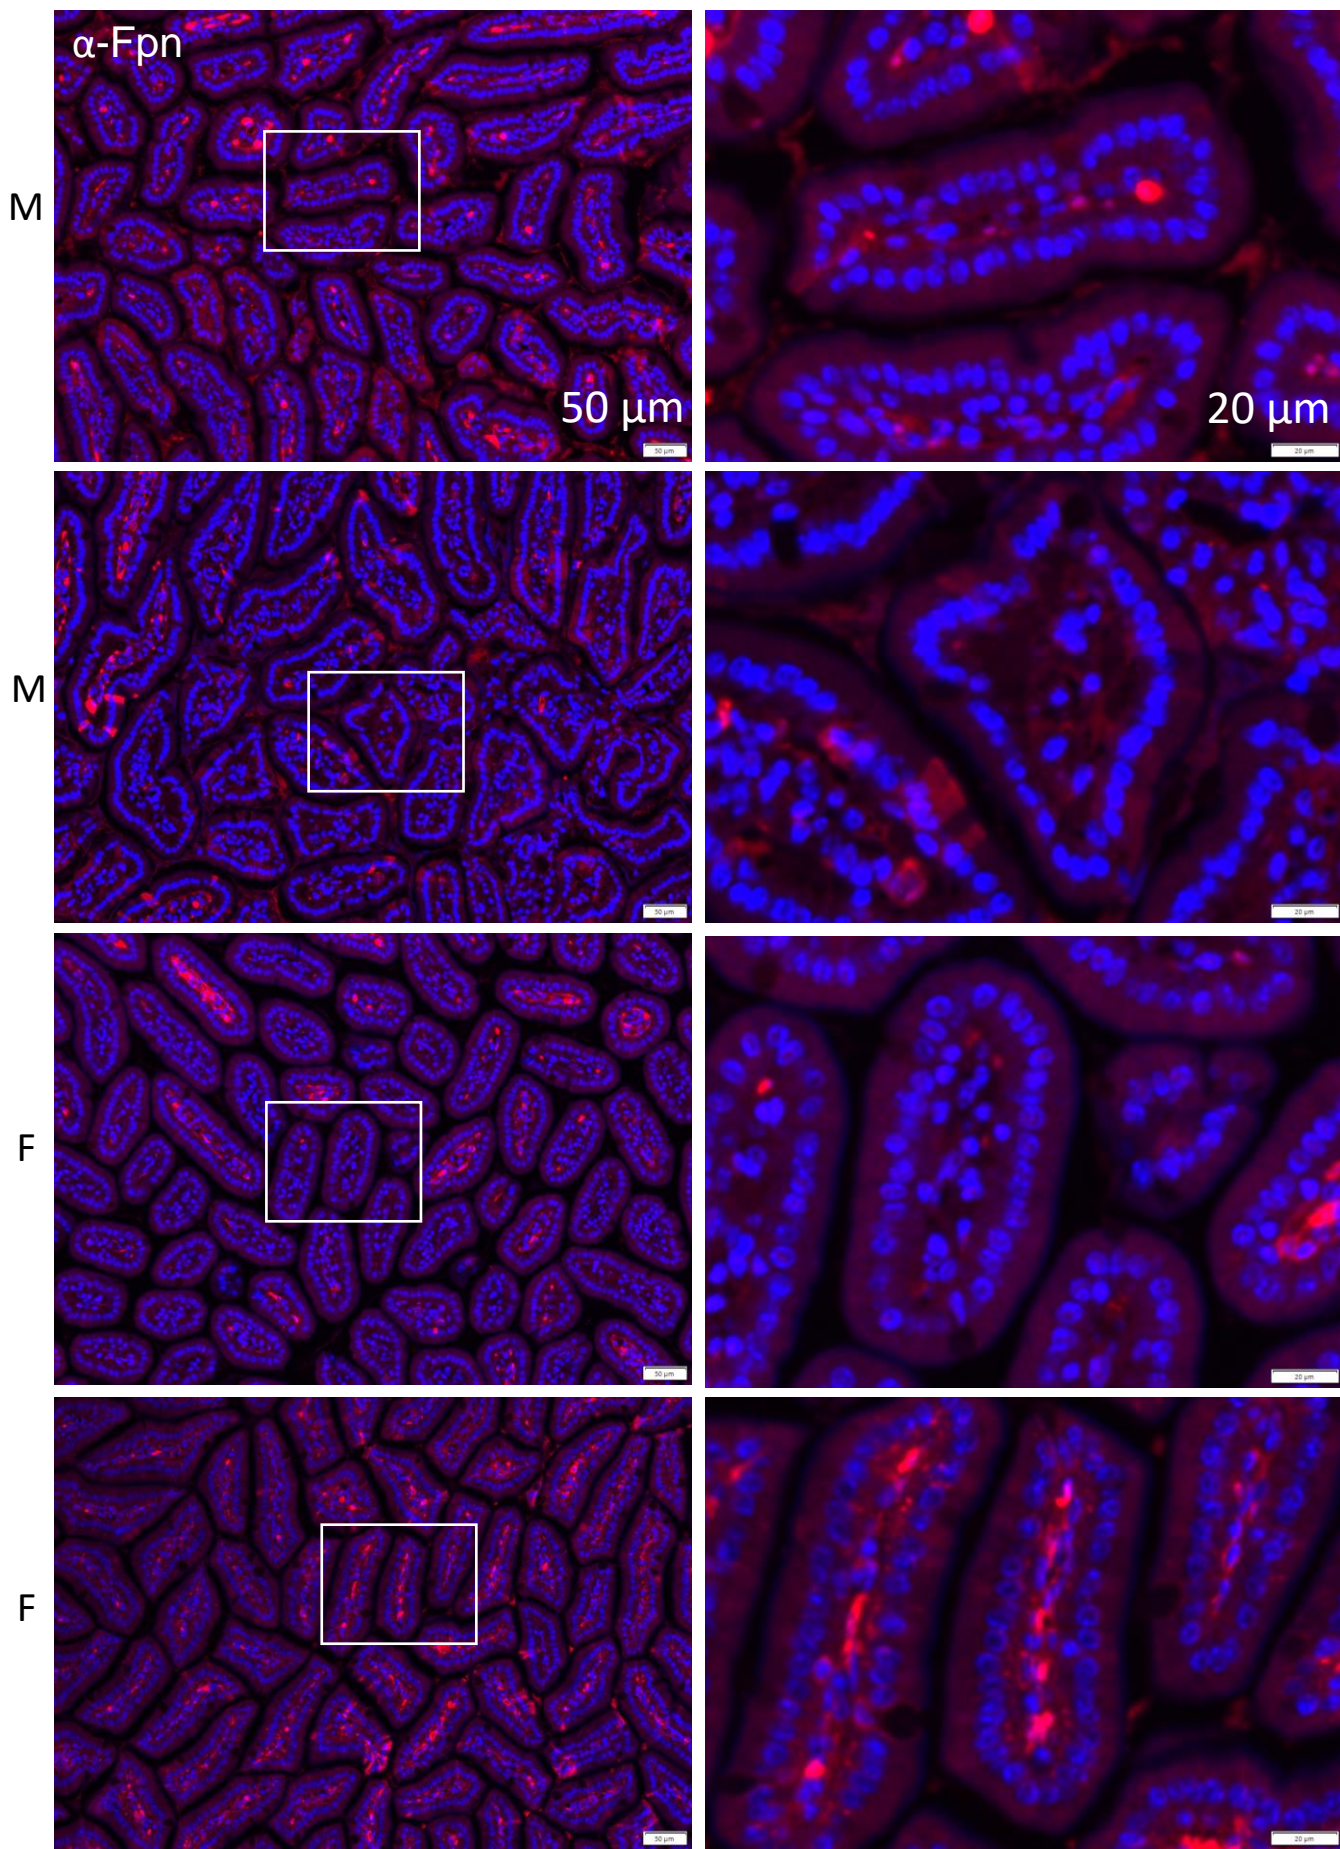

*Slc30a10*<sup>-/-</sup> *Fpn*<sup>fl/fl</sup> Vil-ERT2

Figure S23





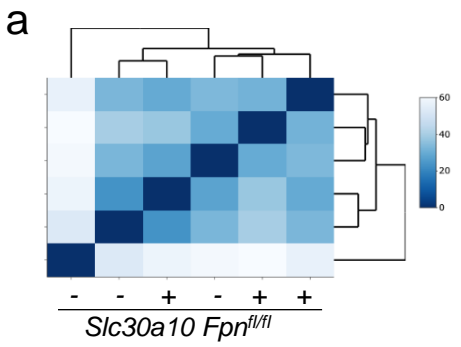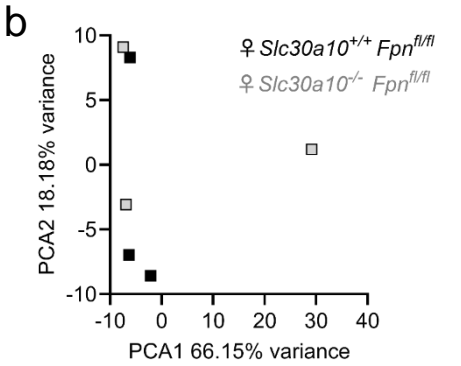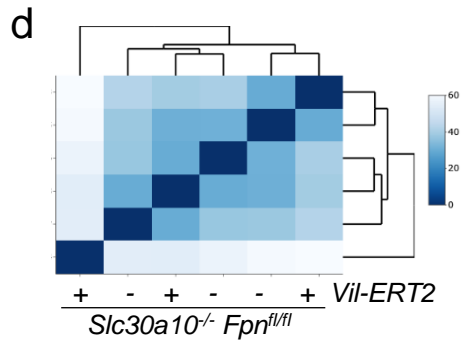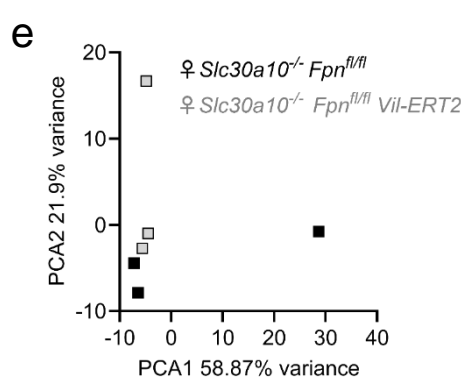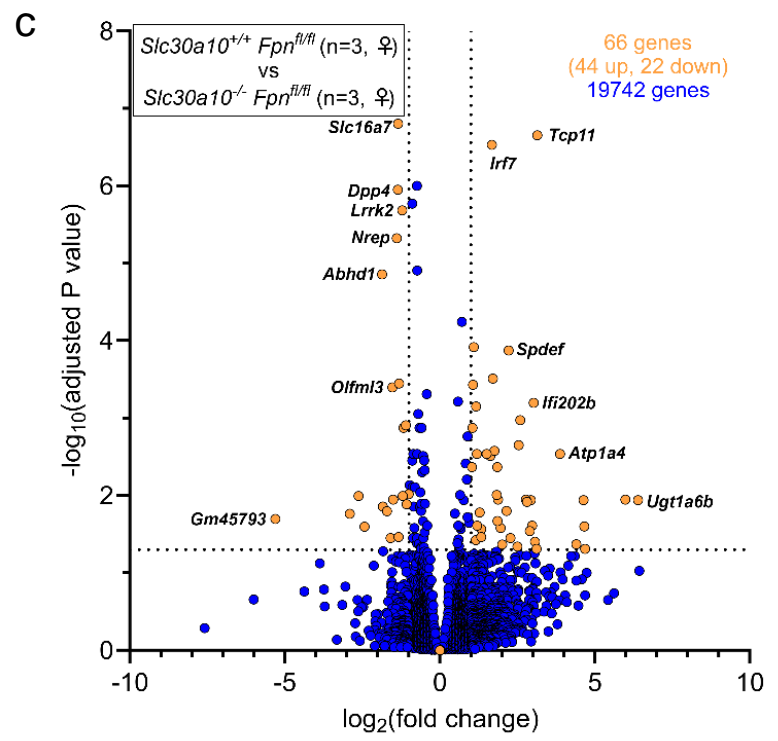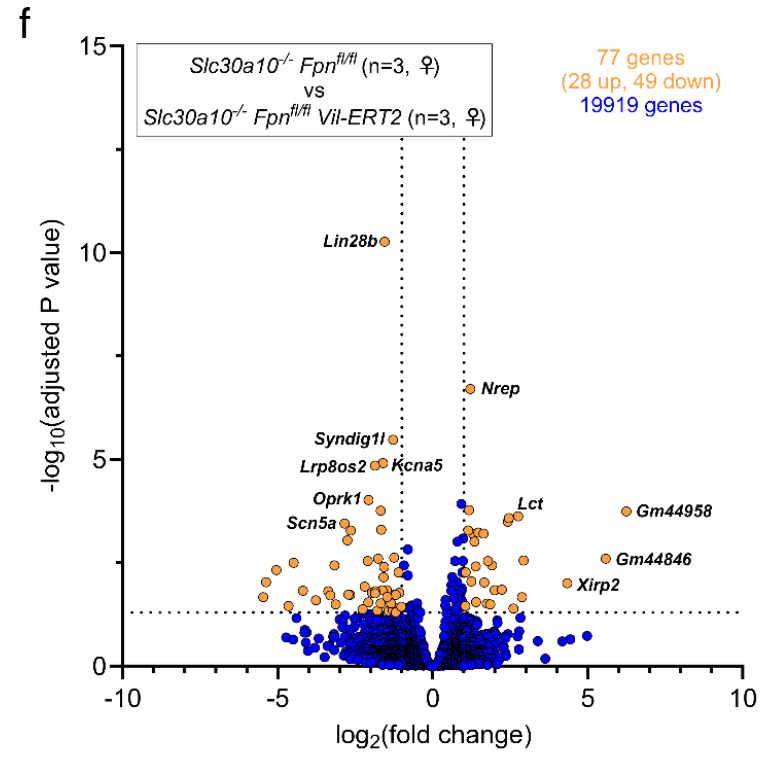

Figure S25

*Slc30a10*<sup>+/+</sup> *Fpn*<sup>fl/fl</sup>  
vs.  
*Slc30a10*<sup>-/-</sup> *Fpn*<sup>fl/fl</sup>

*Slc30a10*<sup>-/-</sup> *Fpn*<sup>fl/fl</sup>  
vs.  
*Slc30a10*<sup>-/-</sup> *Fpn*<sup>fl/fl</sup>  
*Vil*-ERT2

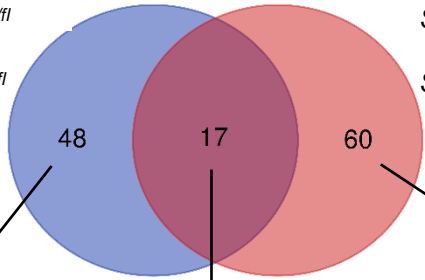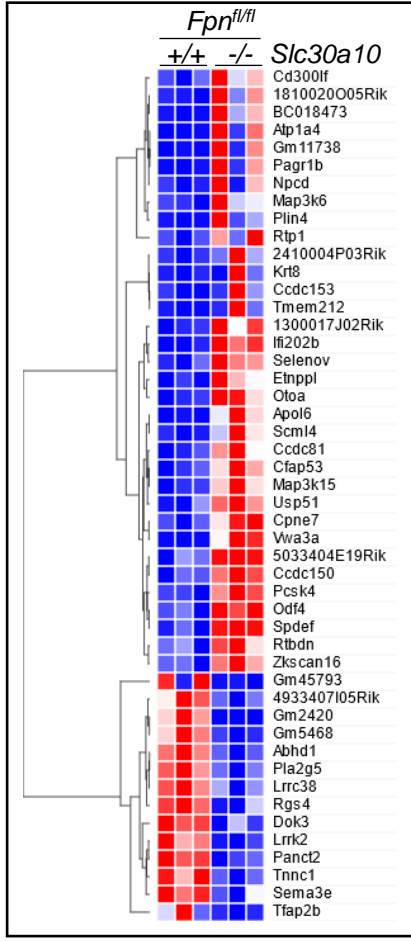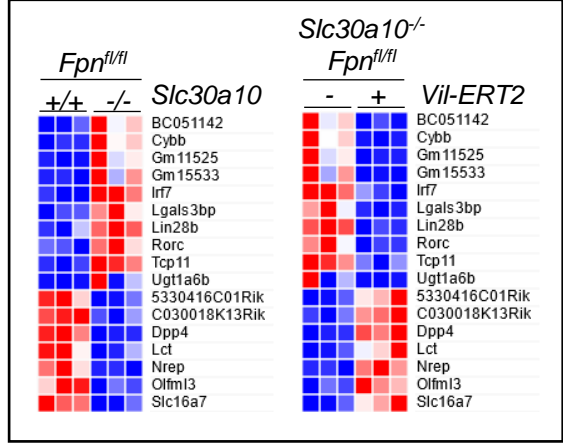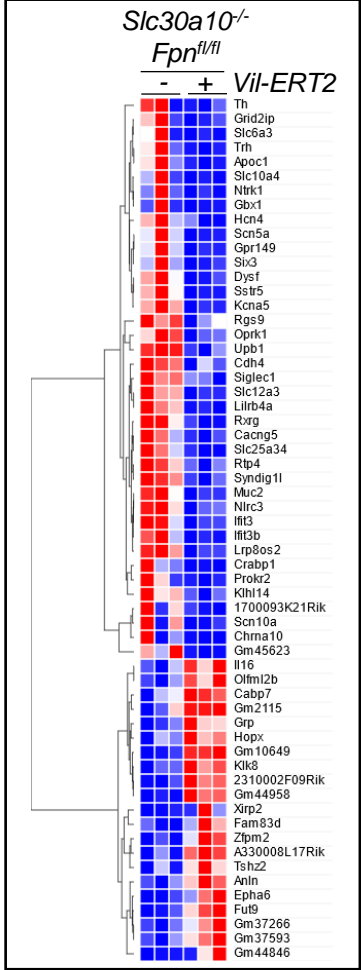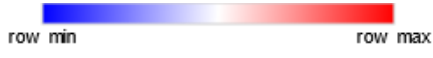

Figure S26

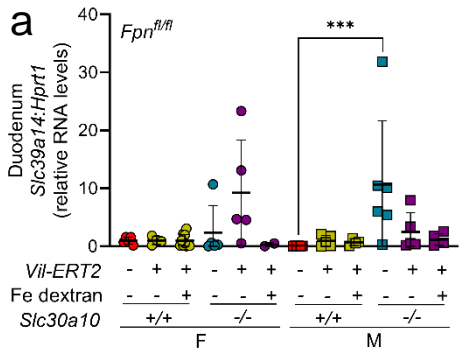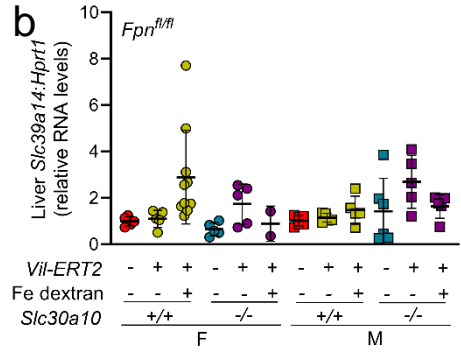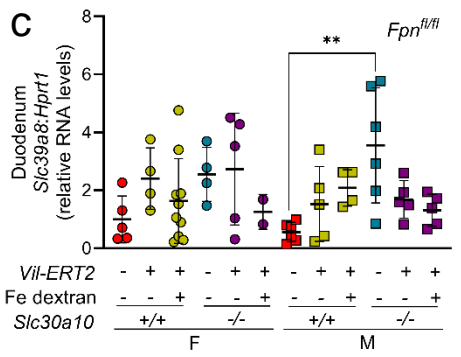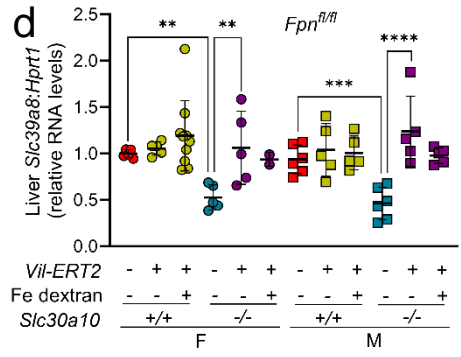

Figure S27

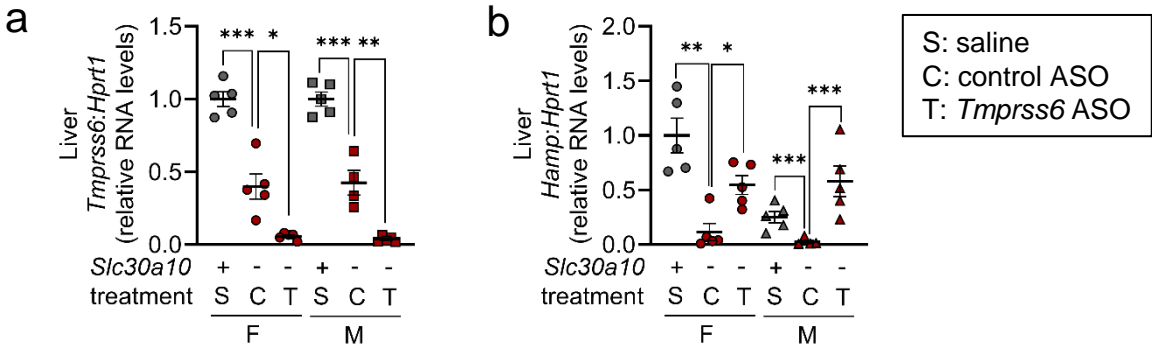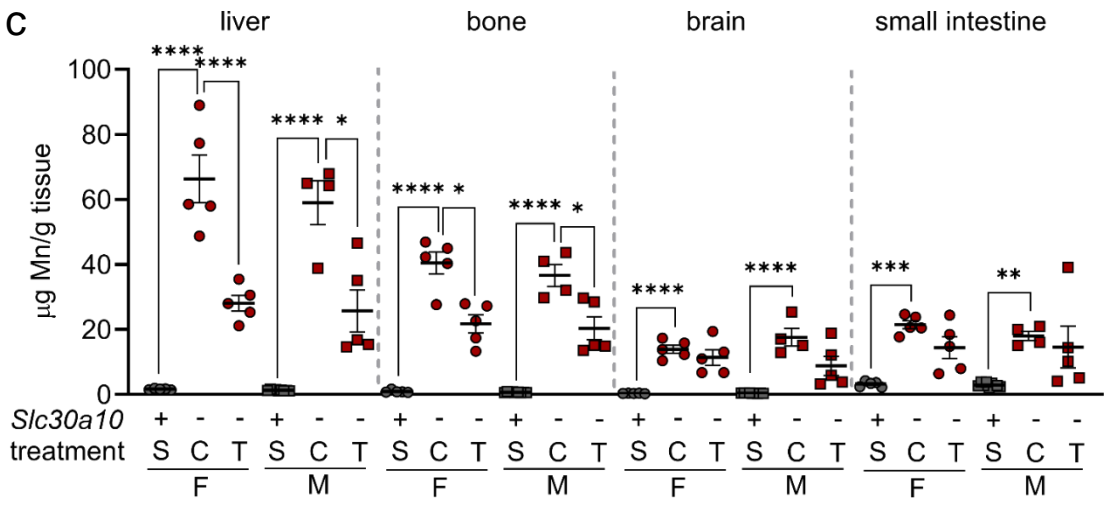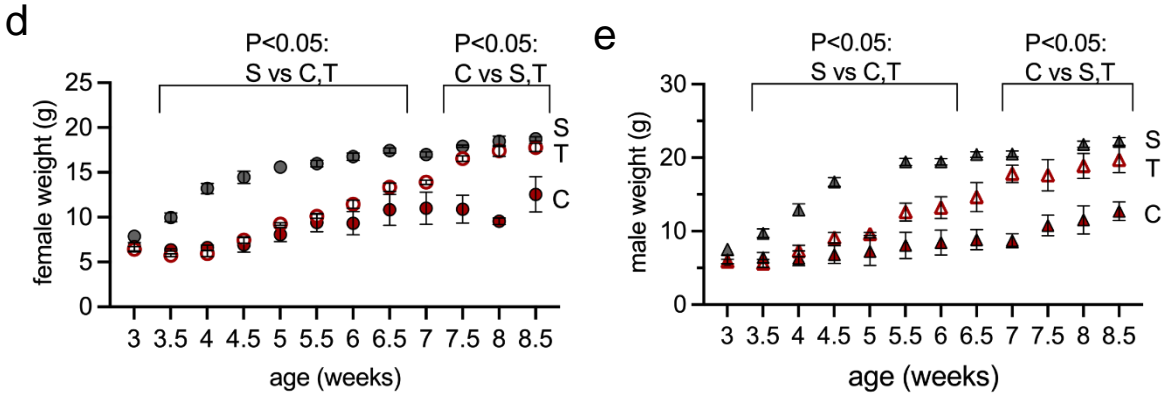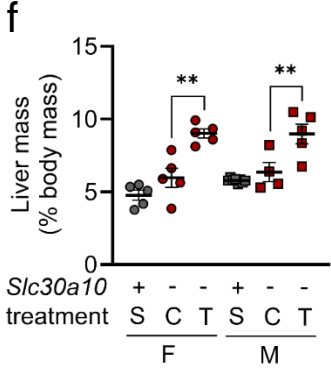

Figure S28

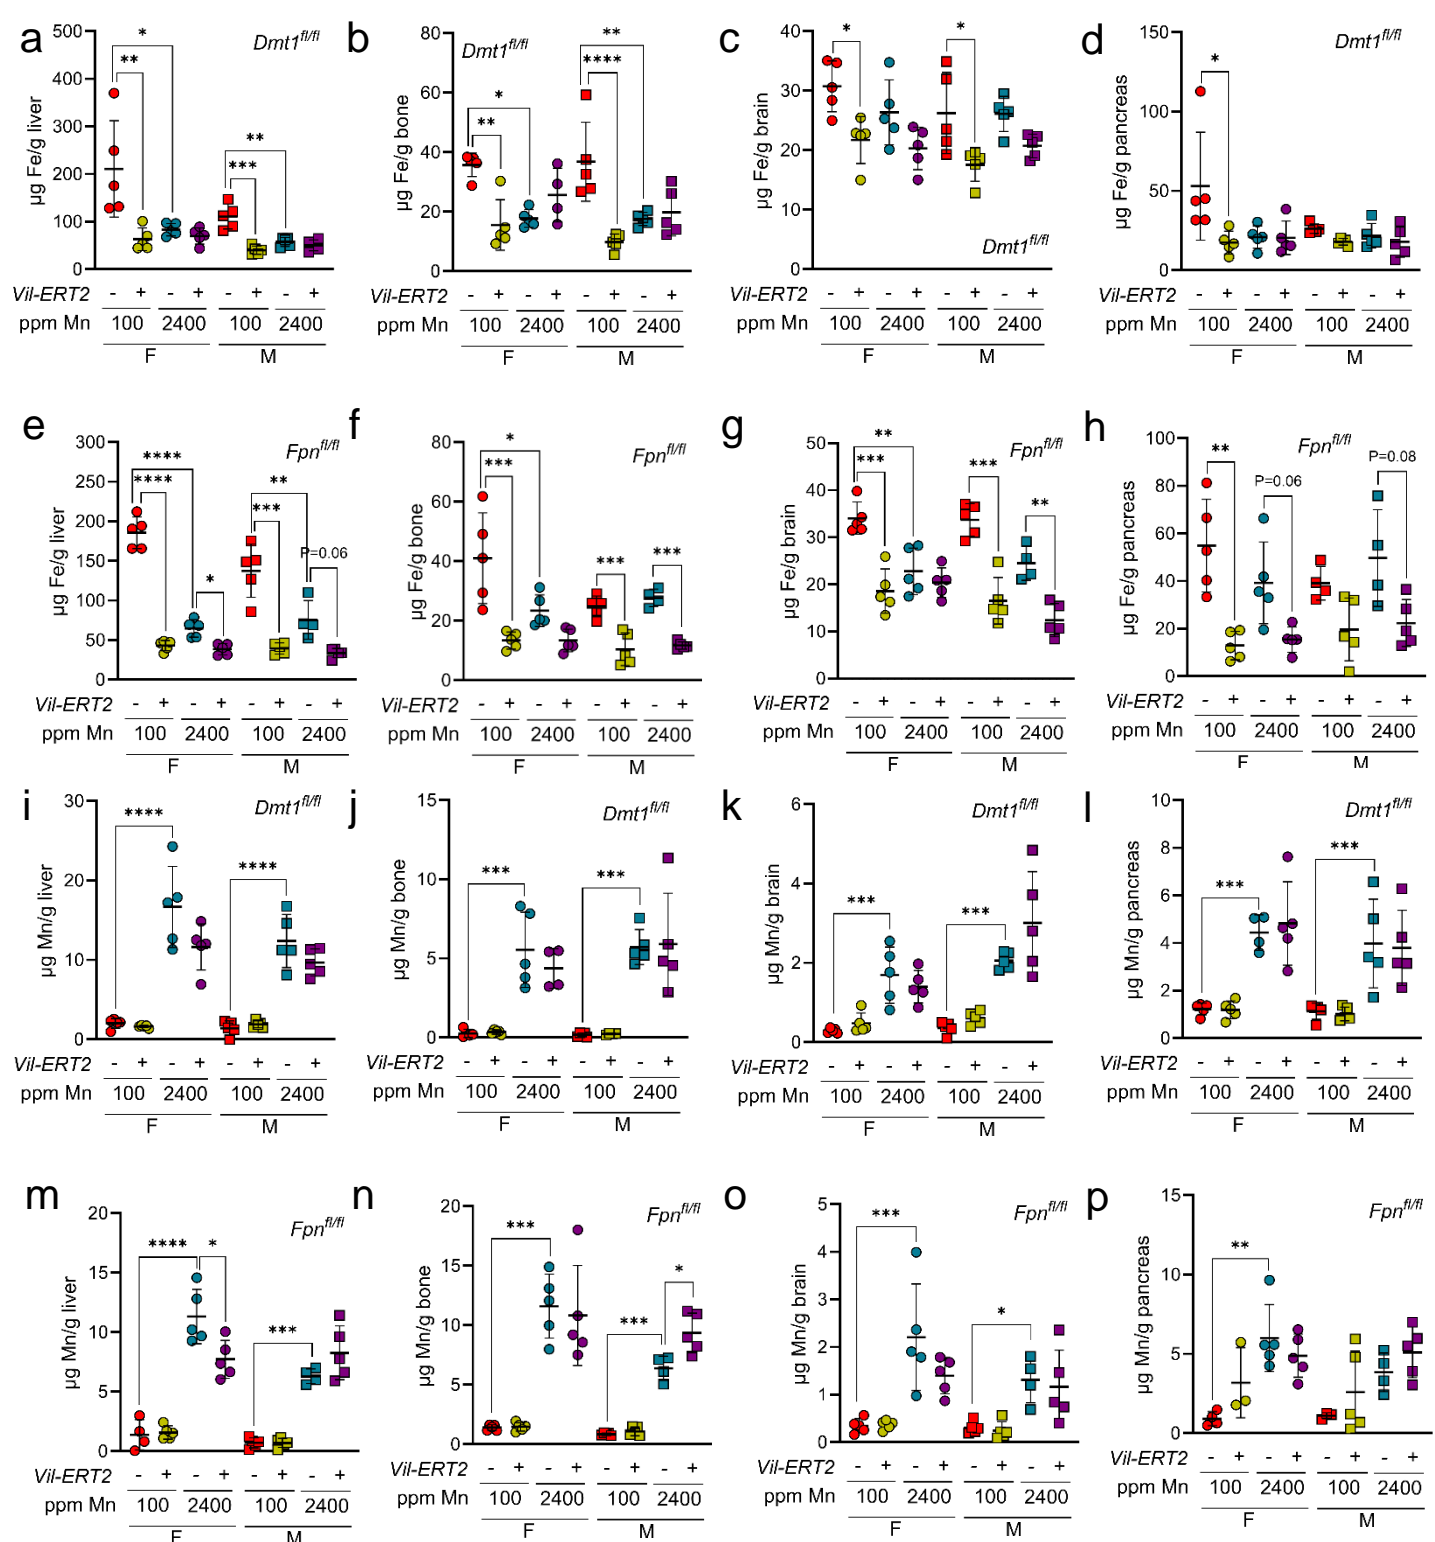

Figure S29

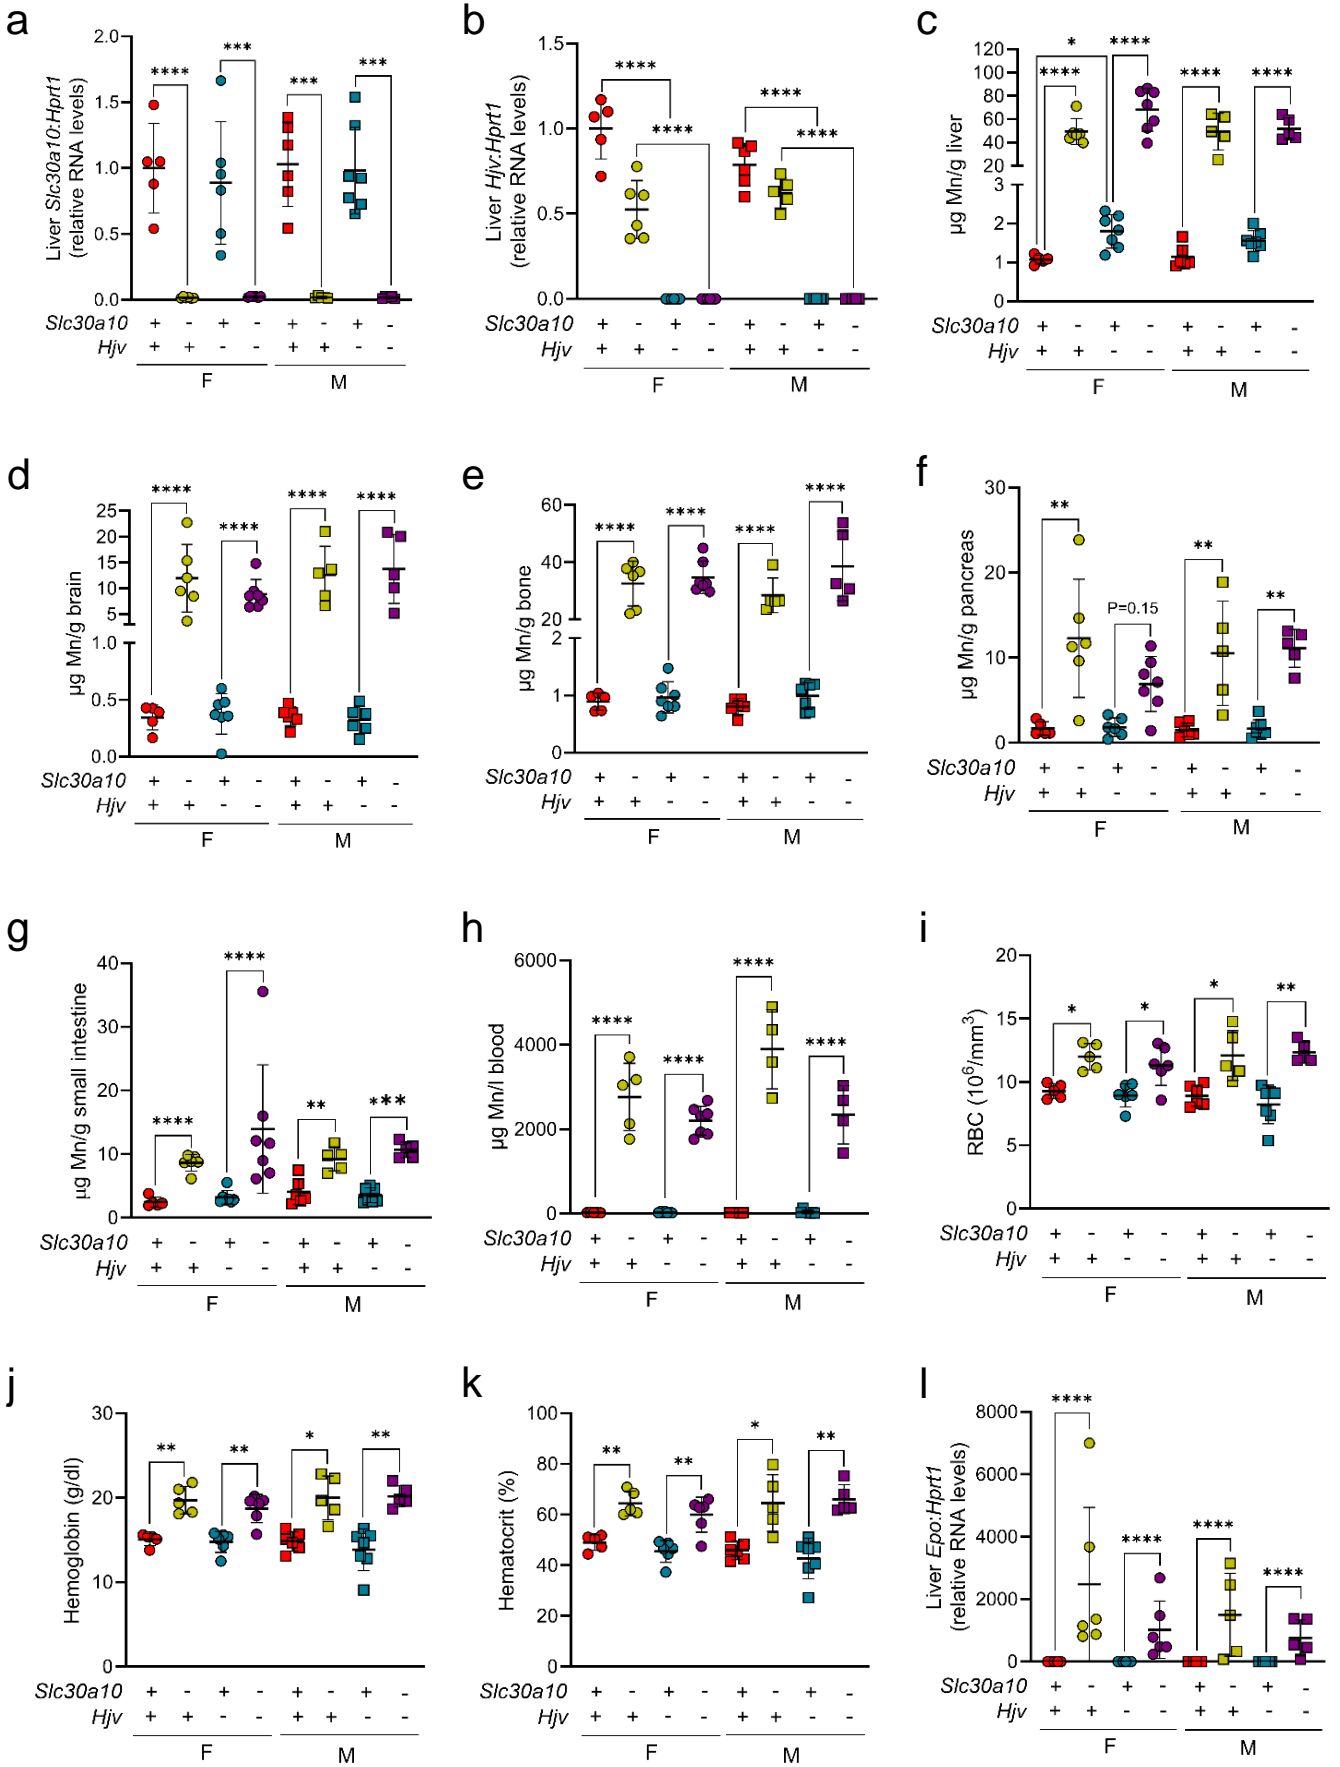

Figure S30

Mn

Fe

Cu

Zn

*Slc30a10<sup>+/+</sup> Hjv<sup>+/+</sup>**Slc30a10<sup>+/+</sup> Hjv<sup>-/-</sup>**Slc30a10<sup>-/-</sup> Hjv<sup>+/+</sup>**Slc30a10<sup>-/-</sup> Hjv<sup>-/-</sup>*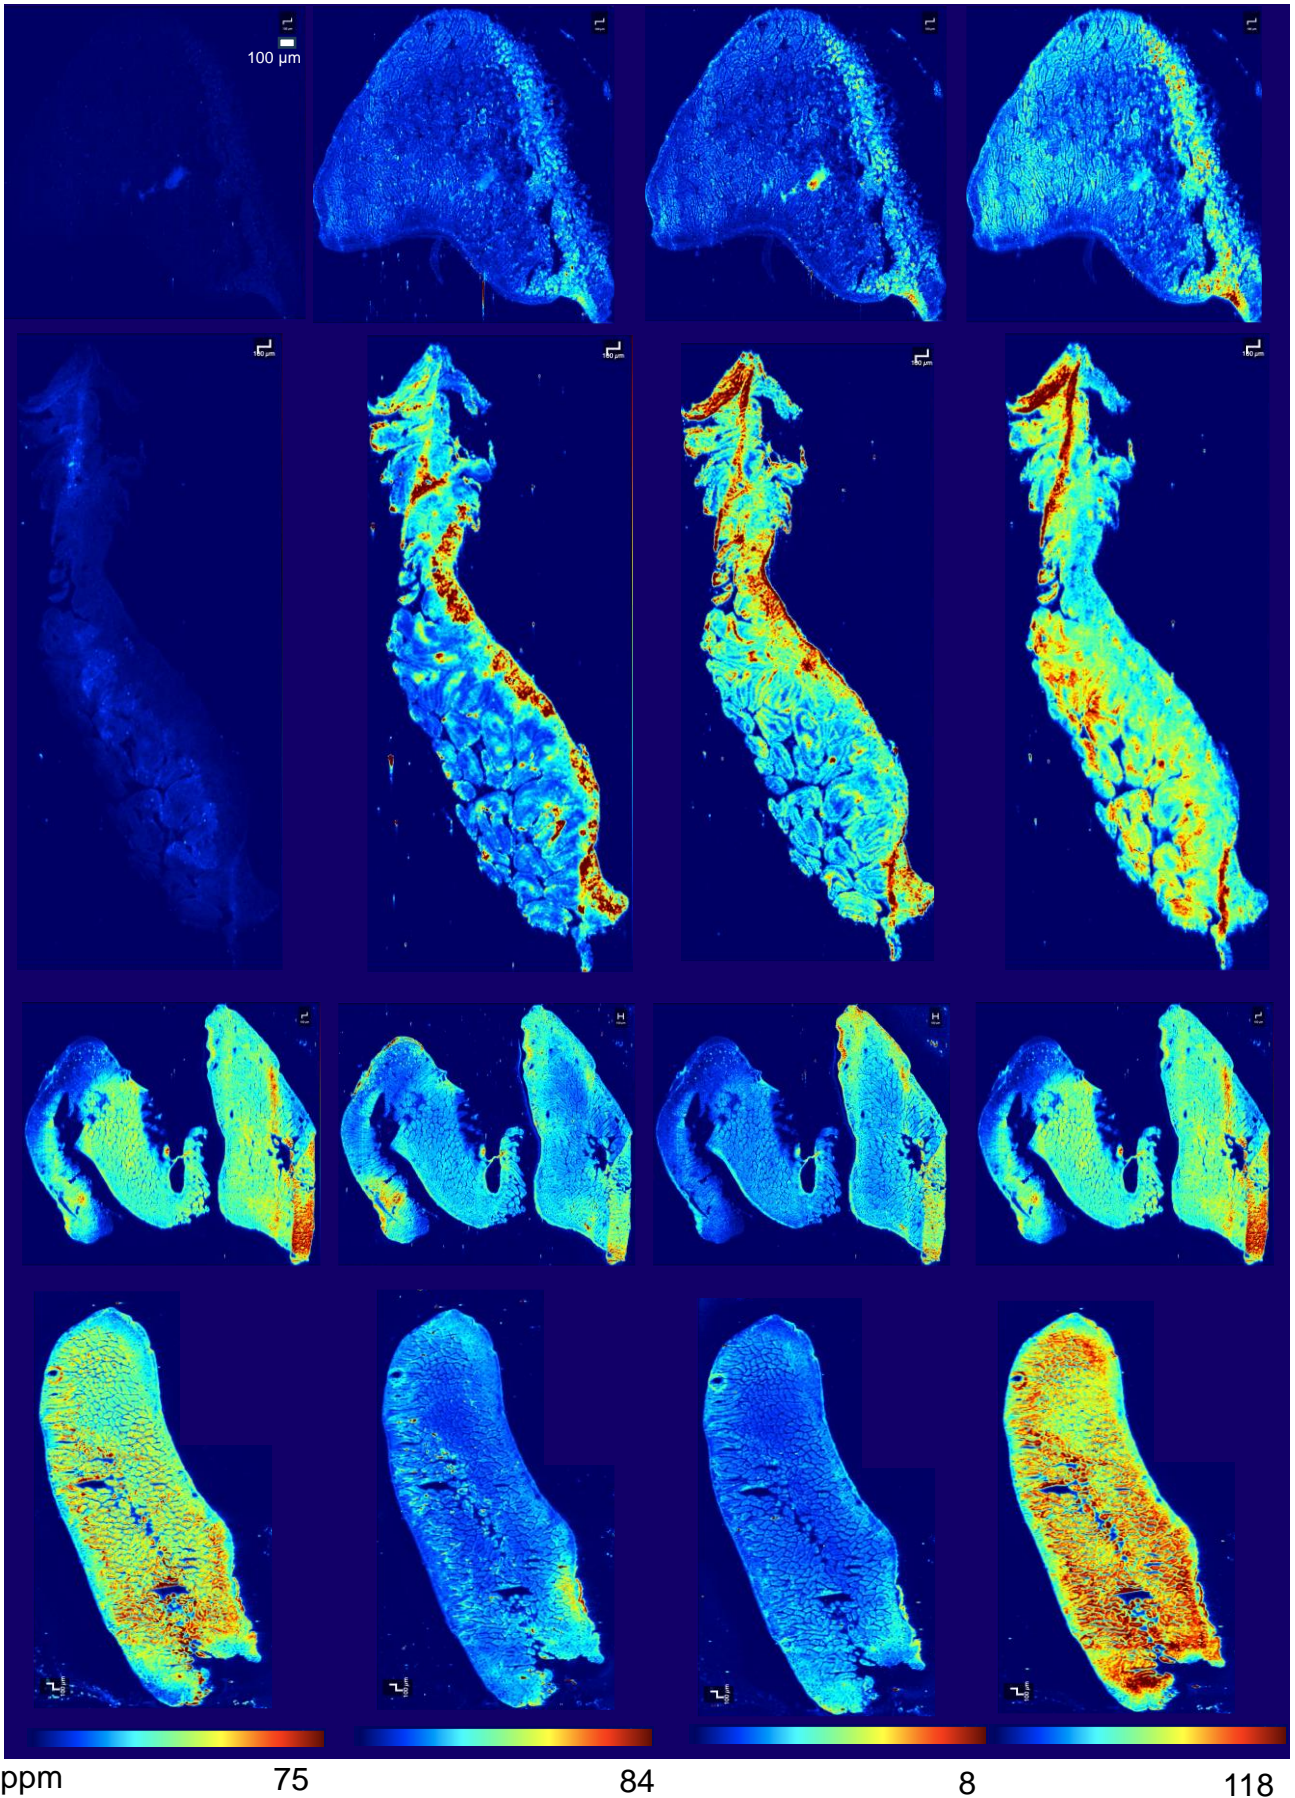

Figure S31

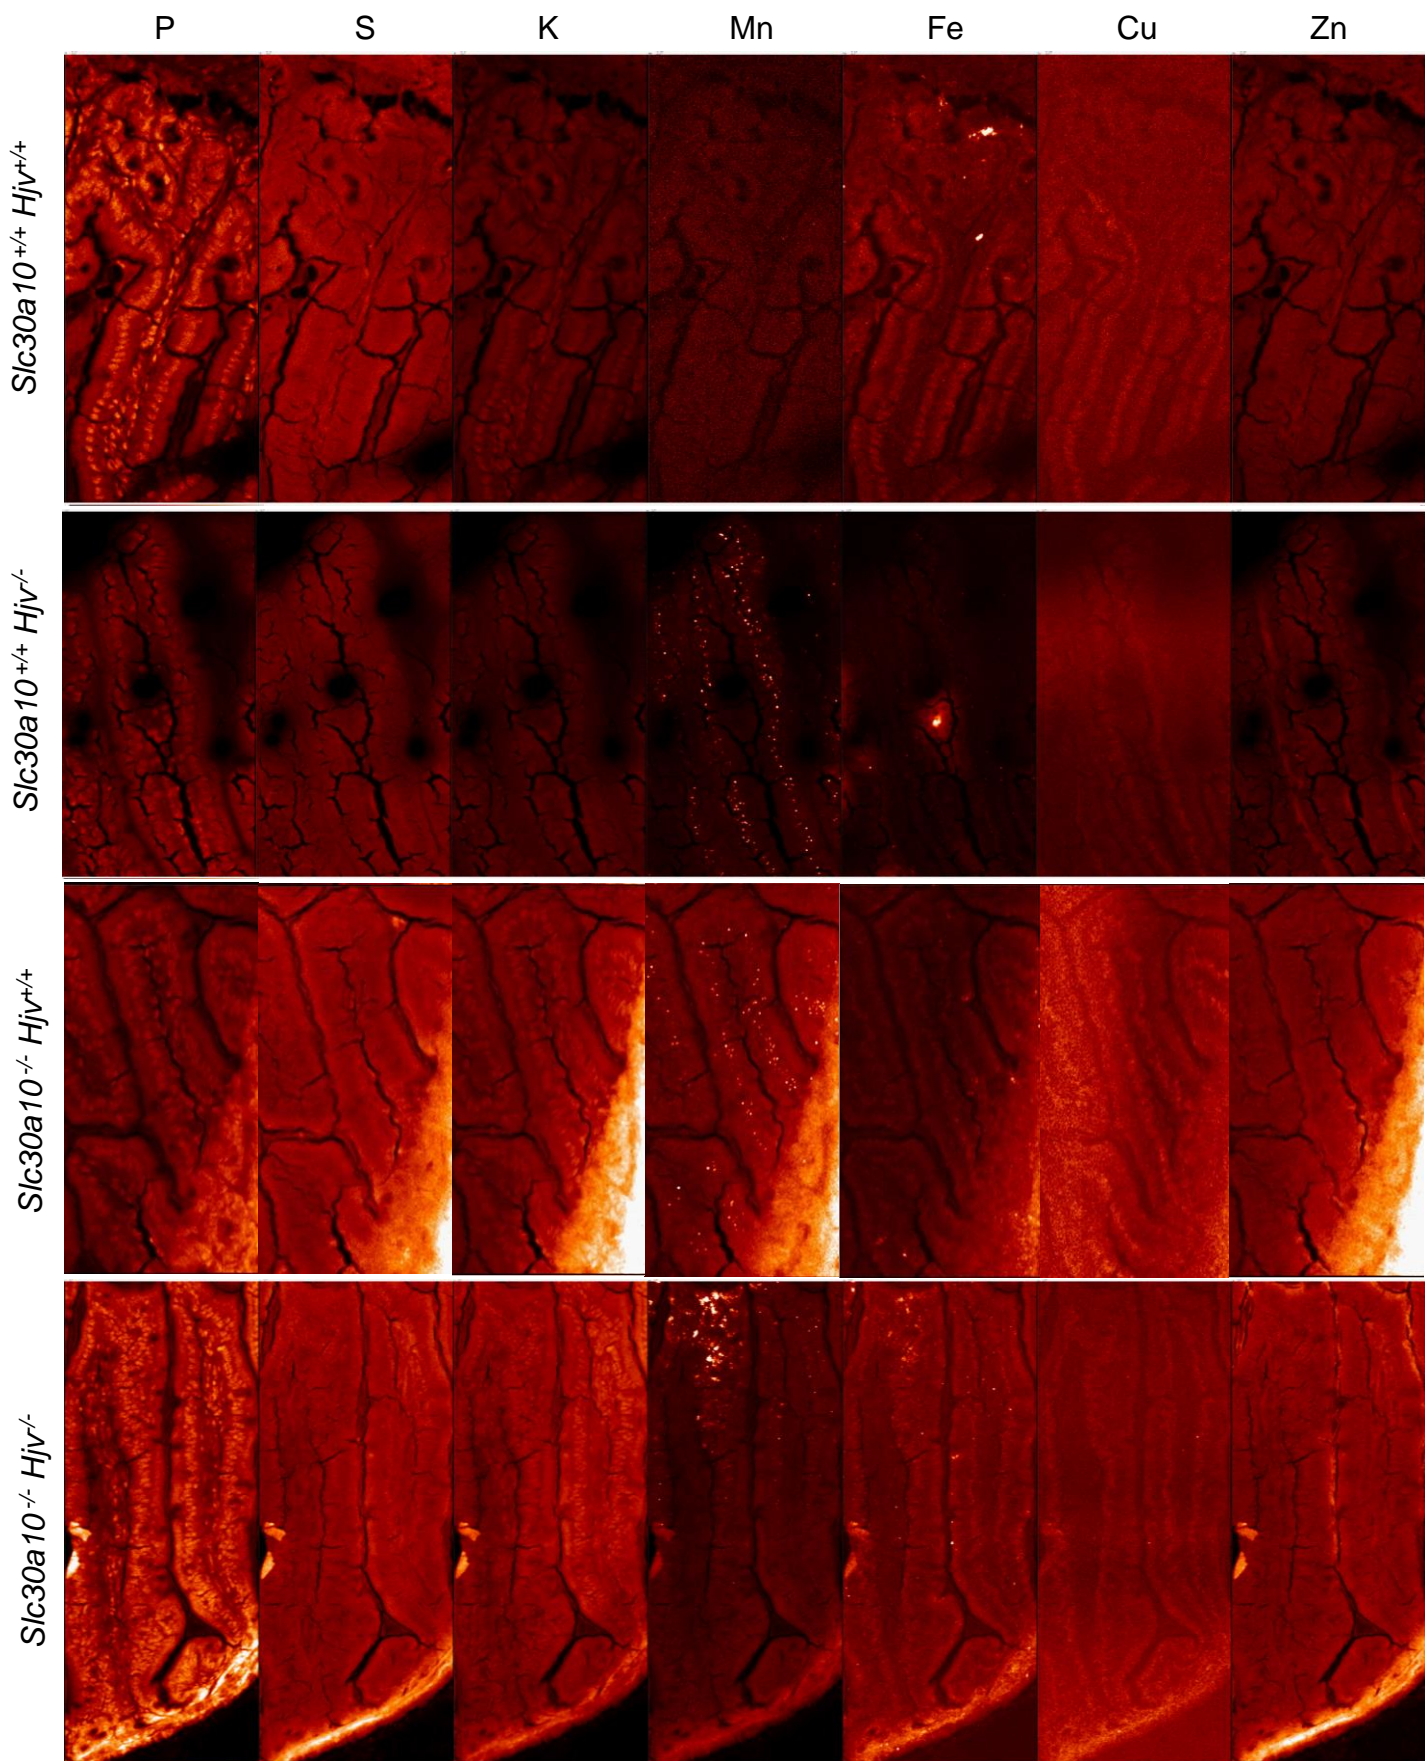

Figure S32



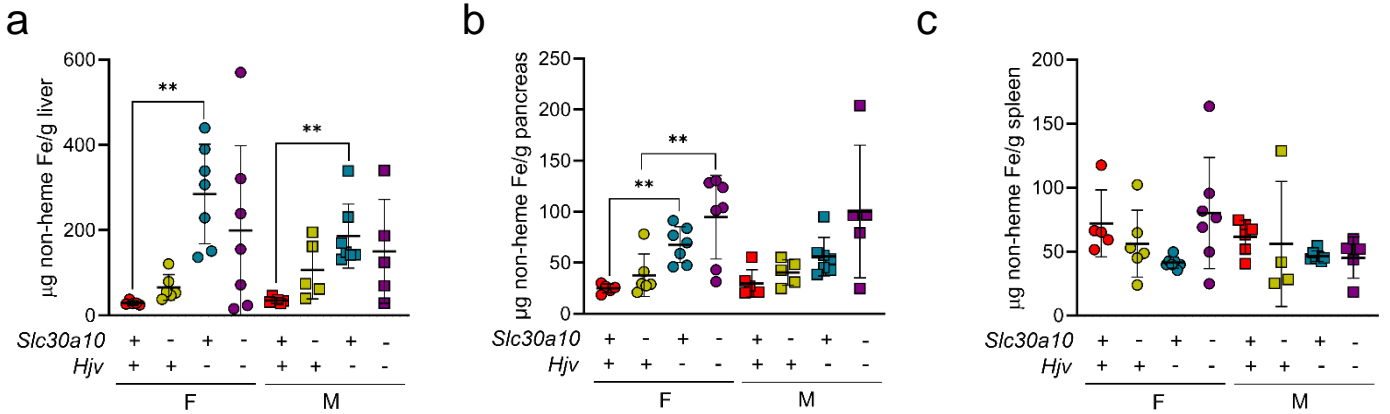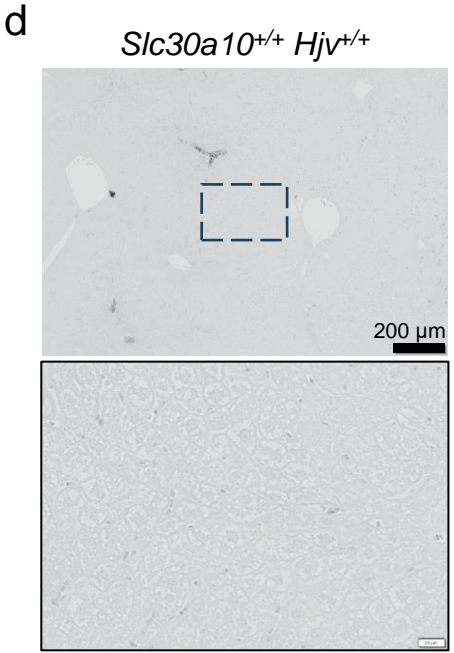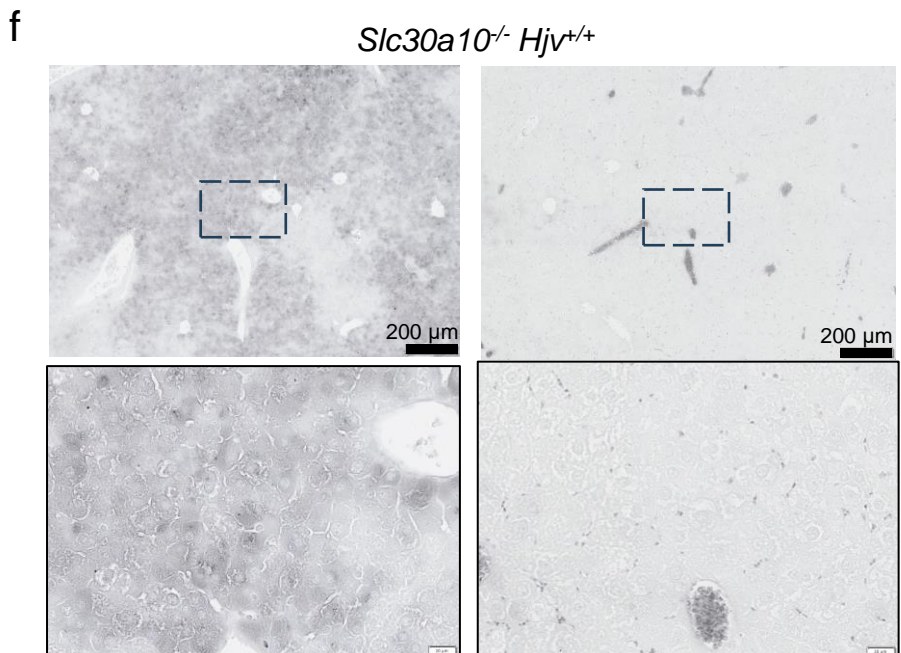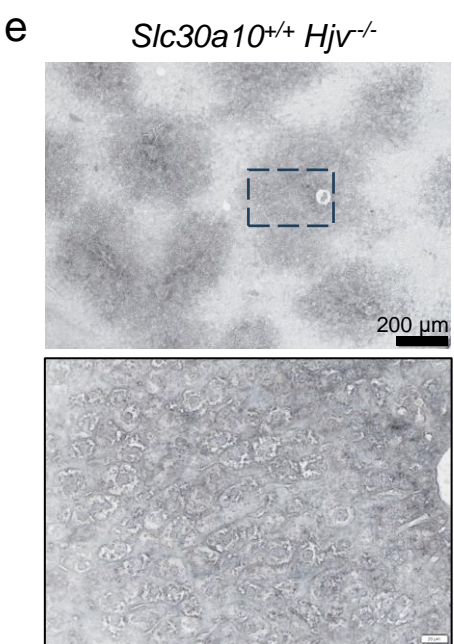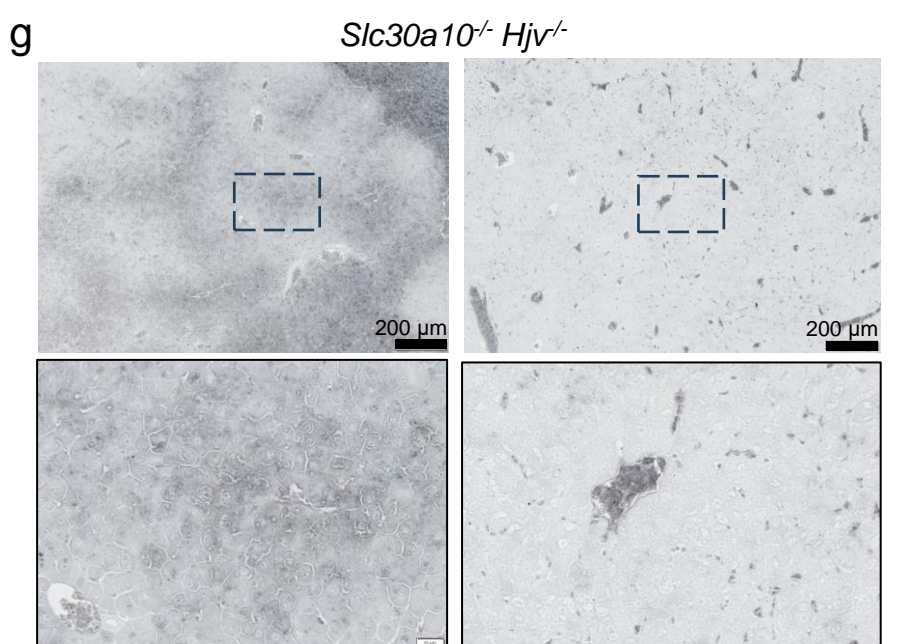

Figure S33

**a**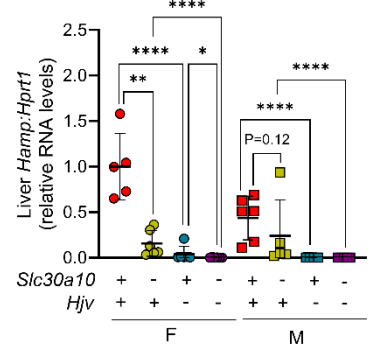**b**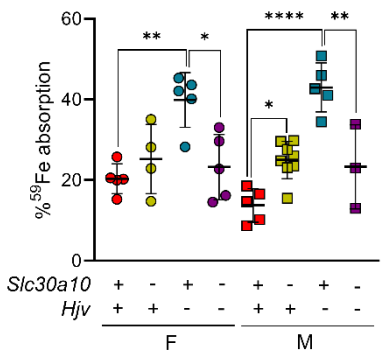**c**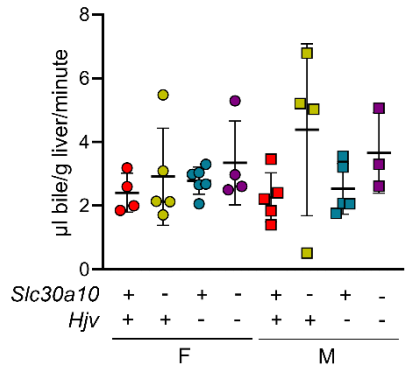**d**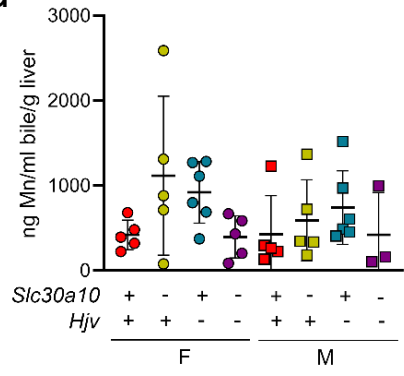**e**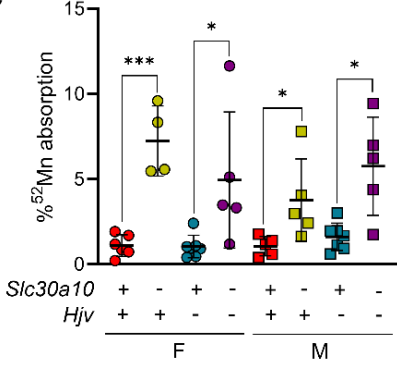

Figure S34

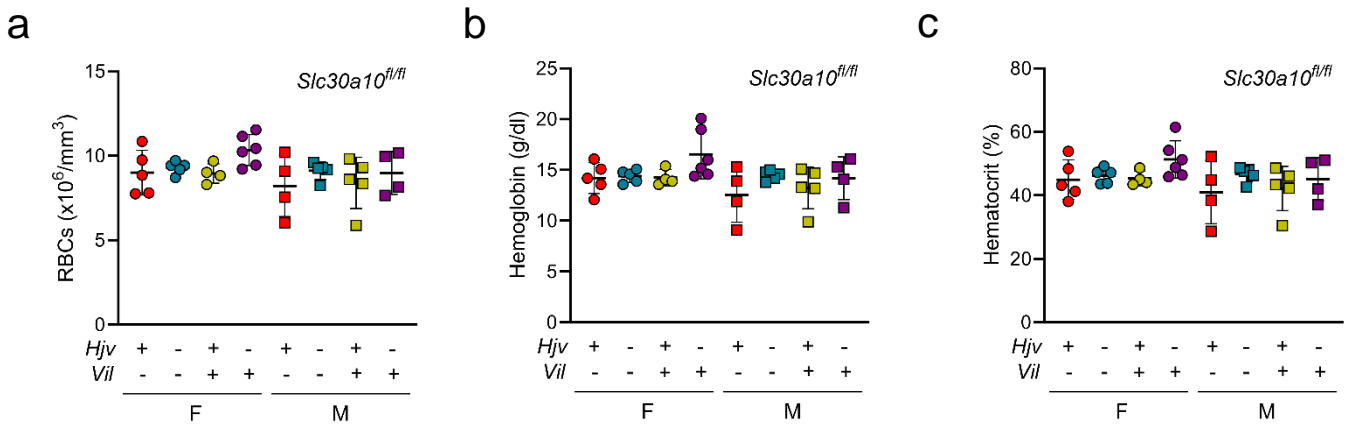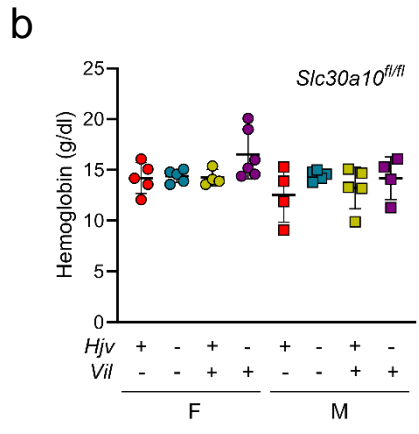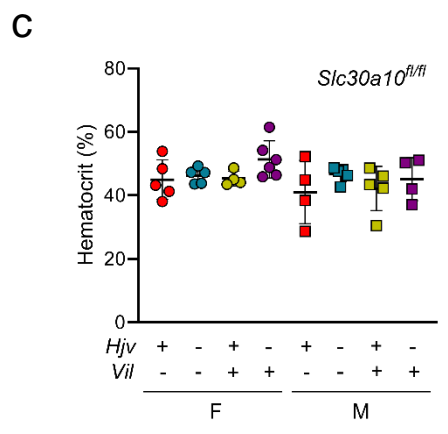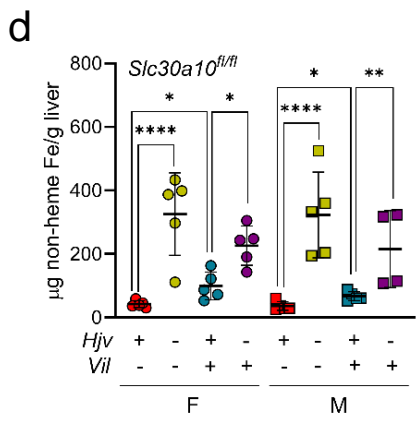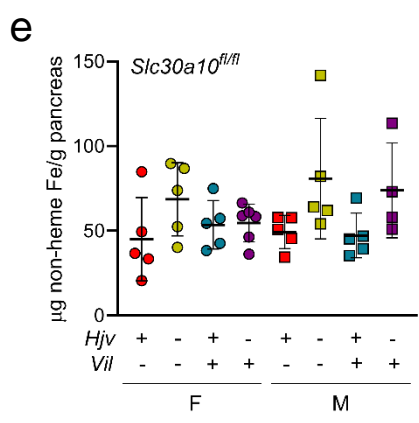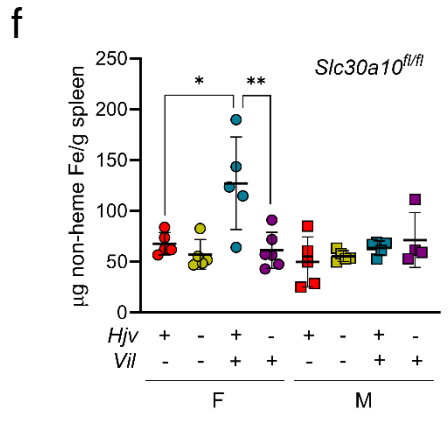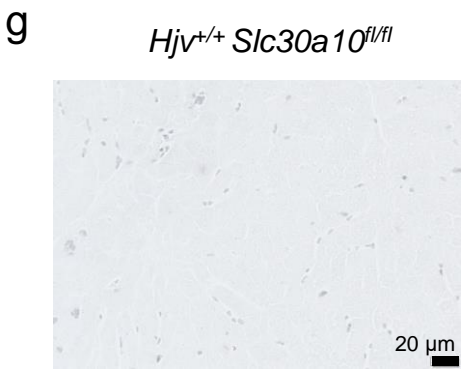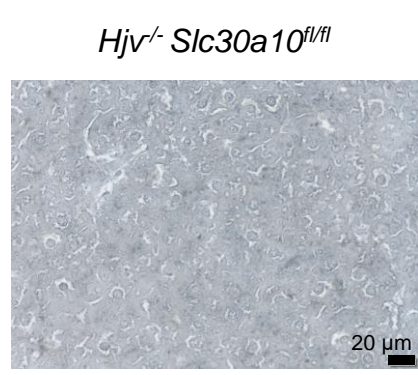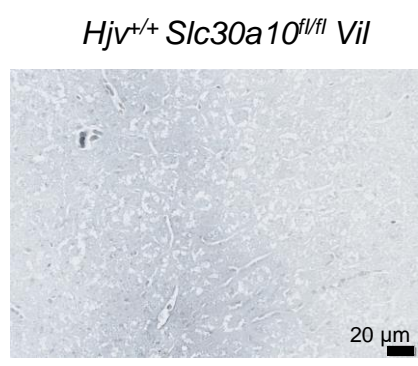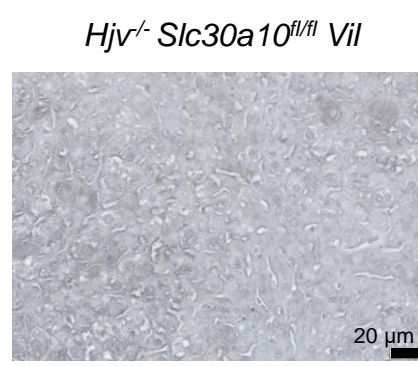

Figure S35
